# Supplementary material for: 歴史教育におけるナショナリズムに関する一考察 : 所謂嘉靖(後期)「倭寇」を中心にして
Source: Hindawi journal article supplement (doi:10.1155/2011/179454), 1996-11-01
Supplement: f1 [file 179454.f1.pdf]

## Supplemental Materials - Figures & Legends

### Supplemental Figure 1. Triglyceride content in differentiated C3H/10T1/2

**adipocytes incubated in washout buffer.** After differentiation, C3H/10T1/2 adipocytes were incubated in the washout medium for 0, 1, 2, or 3 days. The medium was then removed, and adipocytes were permeated with digitonin. Total cellular triglycerides were then hydrolyzed by a triglyceride lipase into glycerol and free fatty acids. Total glycerol was then measured by coupled enzymatic reactions involving glycerol kinase, glycerol phosphate oxidase and peroxidase, leading to production of a quinoneimine dye that shows an absorbance maximum at 540 nm. According to manufacturer's instruction (Sigma), the increase in absorbance at 540 nm is directly proportional to triglyceride concentration in the cells, and therefore, cellular total triglyceride content was expressed as optical density (absorbance) at 540 nm. \*  $P < 0.05$  vs 0 day washout, ANOVA.

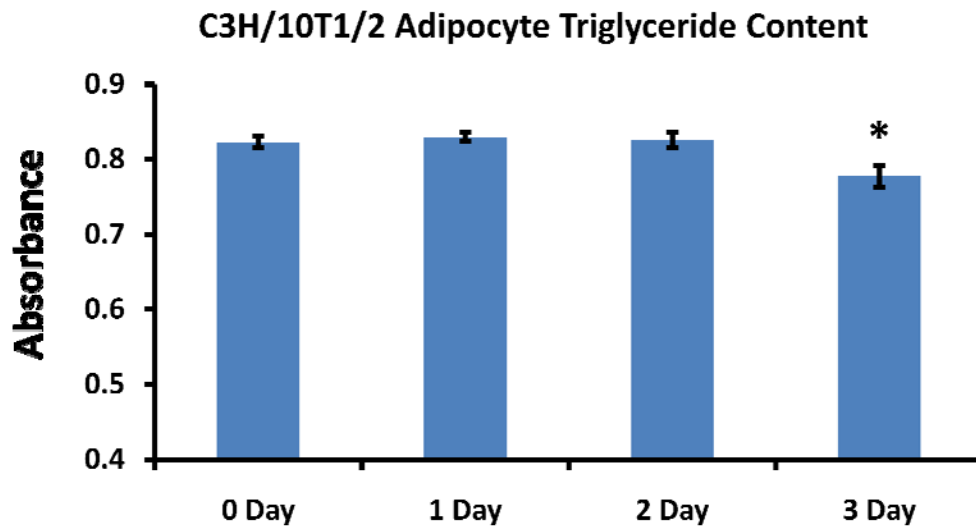

**Supplemental Figure 2. Relative mRNA abundance of brown adipose tissue markers Ucp1 and Cidea in C3H/10T1/2 adipocytes and 3T3-L1 adipocytes, determined by QRT-PCR.** Data were expressed as  $-\Delta\Delta C_t$ , equivalent to log2-transformed fold changes (C3H/10T1/2 adipocytes over 3T3-L1 adipocytes). All numerical data were expressed as mean $\pm$ S.E. \* $p < 0.05$  vs 3T3-L1 adipocytes.

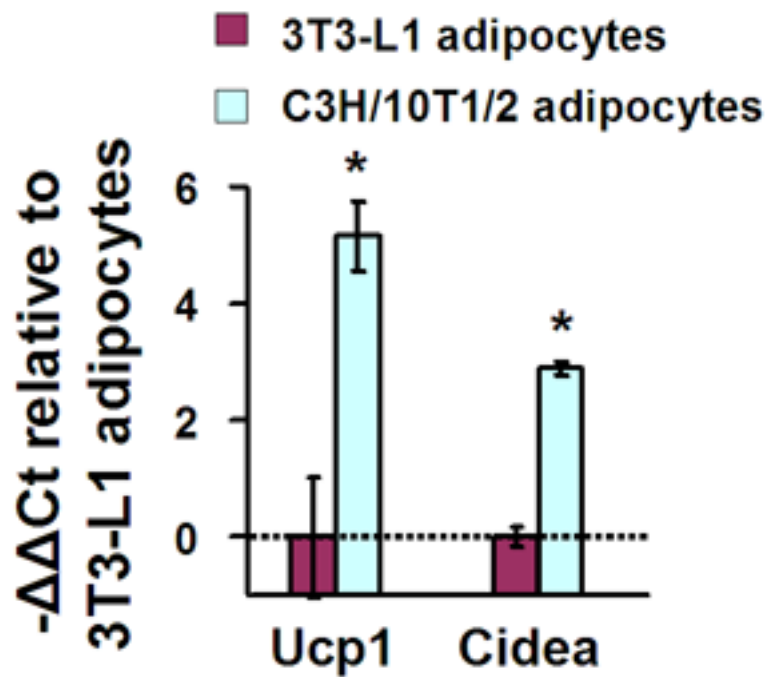

**Supplemental Figure 3. Adipsin (Adn), fatty acid synthase (Fasn), and glucose transporter 1 (Slc2a1), were regulated differently by RSG in 3T3-L1 and C3H/10T1/2 adipocytes.** Shown are heatmaps of mean fold-changes of probe set intensities in 3T3-L1 and C3H/10T1/2 adipocytes treated with RSG compared to DMSO over time (n = 3 per time point in each cell type). Each row represents one probe set. Glucose transporter 1 (Slc2a1) was represented by 3 probe sets. Only fold-changes significantly different ( $p < 0.05$ ) were shown in colors (red or green).

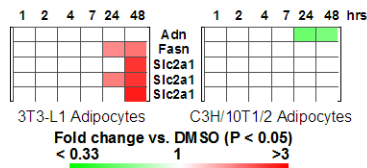

**Supplemental Table 1A. Regulation of adipocyte and fibroblast/preadipocyte marker genes with the washout conditions in C3H/10T1/2 cells.** Mean intensity values from the microarray experiment were shown (n = 3). One way ANOVA was performed, and  $p < 0.05$  was considered significant. For all probesets, the intensities in adipocytes with no washout and adipocytes with 1-day washout were not significantly different from each other, but both were significantly different from the intensities in the respective fibroblast/predipocyte.

| Probeset     | Gene   | Condition                     | Intensity |
|--------------|--------|-------------------------------|-----------|
| 1422651_at   | Adipoq | Fibroblast/preadipocyte       | 4         |
| 1422651_at   | Adipoq | Adipocytes with no washout    | 5135      |
| 1422651_at   | Adipoq | Adipocytes with 1-day washout | 5271      |
| 1417023_a_at | Fabp4  | Fibroblast/preadipocyte       | 25        |
| 1417023_a_at | Fabp4  | Adipocytes with no washout    | 5422      |
| 1417023_a_at | Fabp4  | Adipocytes with 1-day washout | 5582      |
| 1424155_at   | Fabp4  | Fibroblast/preadipocyte       | 3         |
| 1424155_at   | Fabp4  | Adipocytes with no washout    | 465       |
| 1424155_at   | Fabp4  | Adipocytes with 1-day washout | 663       |
| 1425809_at   | Fabp4  | Fibroblast/preadipocyte       | 16        |
| 1425809_at   | Fabp4  | Adipocytes with no washout    | 370       |
| 1425809_at   | Fabp4  | Adipocytes with 1-day washout | 499       |
| 1451263_a_at | Fabp4  | Fibroblast/preadipocyte       | 13        |
| 1451263_a_at | Fabp4  | Adipocytes with no washout    | 1627      |
| 1451263_a_at | Fabp4  | Adipocytes with 1-day washout | 1860      |
| 1417148_at   | Pdgfrb | Fibroblast/preadipocyte       | 187       |
| 1417148_at   | Pdgfrb | Adipocytes with no washout    | 39        |
| 1417148_at   | Pdgfrb | Adipocytes with 1-day washout | 30        |
| 1436970_a_at | Pdgfrb | Fibroblast/preadipocyte       | 386       |
| 1436970_a_at | Pdgfrb | Adipocytes with no washout    | 130       |
| 1436970_a_at | Pdgfrb | Adipocytes with 1-day washout | 103       |

**Supplemental Table 1B. Regulation of adipocyte and fibroblast/preadipocyte marker genes with the washout conditions in 3T3 L1 cells.** Mean intensity values from the microarray experiment were shown (n = 3). One way ANOVA was performed, and  $p < 0.05$  was considered significant. For all probesets, the intensities in adipocytes with no

washout and adipocytes with 1-day washout were not significantly different from each other, but both were significantly different from the intensities in the respective fibroblast/predipocyte.

| <b>Probeset</b> | <b>Gene</b> | <b>Condition</b>              | <b>Intensity</b> |
|-----------------|-------------|-------------------------------|------------------|
| 1422651_at      | Adipoq      | Fibroblast/preadipocyte       | 8                |
| 1422651_at      | Adipoq      | Adipocytes with no washout    | 7481             |
| 1422651_at      | Adipoq      | Adipocytes with 1-day washout | 7356             |
| 1417023_a_at    | Fabp4       | Fibroblast/preadipocyte       | 46               |
| 1417023_a_at    | Fabp4       | Adipocytes with no washout    | 5483             |
| 1417023_a_at    | Fabp4       | Adipocytes with 1-day washout | 5123             |
| 1424155_at      | Fabp4       | Fibroblast/preadipocyte       | 10               |
| 1424155_at      | Fabp4       | Adipocytes with no washout    | 138              |
| 1424155_at      | Fabp4       | Adipocytes with 1-day washout | 139              |
| 1425809_at      | Fabp4       | Fibroblast/preadipocyte       | 29               |
| 1425809_at      | Fabp4       | Adipocytes with no washout    | 140              |
| 1425809_at      | Fabp4       | Adipocytes with 1-day washout | 162              |
| 1451263_a_at    | Fabp4       | Fibroblast/preadipocyte       | 16               |
| 1451263_a_at    | Fabp4       | Adipocytes with no washout    | 1093             |
| 1451263_a_at    | Fabp4       | Adipocytes with 1-day washout | 1167             |
| 1417148_at      | Pdgfrb      | Fibroblast/preadipocyte       | 174              |
| 1417148_at      | Pdgfrb      | Adipocytes with no washout    | 40               |
| 1417148_at      | Pdgfrb      | Adipocytes with 1-day washout | 48               |
| 1436970_a_at    | Pdgfrb      | Fibroblast/preadipocyte       | 422              |
| 1436970_a_at    | Pdgfrb      | Adipocytes with no washout    | 114              |
| 1436970_a_at    | Pdgfrb      | Adipocytes with 1-day washout | 128              |

**Supplemental Table 1C. Responses of PDK4 and PCK1 to rosiglitazone in**

**C3H/10T1/2 and 3T3-L1 adipocytes.** Differentiated C3H/10T1/2 and 3T3-L1

adipocytes were incubated with washout medium for 0, 1, 2, or 3 days and then treated with rosiglitazone (1  $\mu$ M) or DMSO in the washout medium for 4 hours. Total RNA was extracted from the adipocytes and subject to QRT-PCR after reverse transcription. (1  $\mu$ M) Fold change.  $P < 0.05$  vs untreated adipocytes with the respective wash-out condition. The relative RNA abundance of PDK4 and PCK1 in rosiglitazone-treated adipocytes was normalized to the housekeeping gene 36B4 (Arbp) and expressed as fold change over DMSO-treated cells with the respective washout days. \* $P < 0.05$  vs DMSO.

|            |      | 3 day | 2 day | 1 day | 0 day |
|------------|------|-------|-------|-------|-------|
| C3H/10T1/2 | PDK4 | 1.9*  | 1.8   | 2.7*  | 1.3   |
|            | PCK1 | 1.0   | 1.0   | 1.4   | 1.2   |
| 3T3-L1     | PDK4 | 1.4   | 1.1   | 1.3   | 1.0   |
|            | PCK1 | 4.2*  | 5.7*  | 5.5*  | 5.7*  |

**Supplemental Table 2. QRT-PCR primer/probe sequences.**

| Gene name | Forward                  | Reverse                    | Probe                            |
|-----------|--------------------------|----------------------------|----------------------------------|
| Ucp1      | TCCTAGGGACCATCACCACC     | GCAGGCAGACCGCTGTACA        | TGGCAAAACAGAAGGATTGCCGAAA        |
| Adipoq    | CCCAGTCATGCCGAAGATGA     | TGCACAAGTTCCCTTGGGTG       | TGAAGAGCTAGCTCCTGCTTTGGTCCC      |
| Arbp      | GGACCCGAGAAGACCTCCTT     | TCAATGGTGCCTCTGGAGATT      | CCAGGCTTTGGGCATCACCACG           |
| Opa1      | TTGCCTGGGAGACTCTACAAGAG  | AATATGTCGTCGTGTTCTTTCC     | TTTCCCGCTTCATGACAGAACCCAA        |
| Ppargc1b  | AGGAAGCGGCGGGAAA         | CTACAATCTCACCGAACACCTCAA   | AGAGATTTCGAATGTATACCACACGGCCTTCA |
| Scd1      | CTGAATGCGAGGGTTGGTTG     | CCTGCATGGATCAGCCAAAG       | TCCCTGTGCGCTTTGCAAGGTAATGTG      |
| Cs        | CCCCTGCCTGAGGGCTTAT      | GCCAAGACACCTGTTCTCTGT      | TGGCTGCTGGTAACTGGACAGATGCC       |
| Pdgfrb    | GAGGCTTATCCGATGCCTTCT    | AGACATGTTGCGAGTAGACAAAATAA | CAGCGCCGGAGTCACCCAAGGTA          |
| Idh3a     | GCACAAAGCTAACATCATGAGGAT | CCGCAACTTCCCTGCATTT        | ATGGGCTCTTTCTGC                  |
| Cycs      | GCAAGCATAAGACTGGACCAAATC | ATGCCTTTGTTCTTGTGGCATC     | TAAGAGAATCCAGCAGCCTGGCCTGTC      |
| Hadha     | AAGCTGGACGCCTTGACCAC     | GATCTTCTGCTACGTGCTGTGC     | TACATCCACACCCACTTCGTCTGCCAG      |
| Pck1      | CCACAGCTGCTGCAGAACAC     | GAAGGGTCGCATGGCAAA         | AGGGCAAGATCATCATGCACGACCC        |
| Pdk4      | CAAAGACGGGAAACCCAAGC     | CGCAGAGCATCTTGCACAC        | TCGACCCAACTGTGATGTGGTAGCAG       |

**Supplemental Table 3. Expression of brown adipose tissue markers in 3T3 L1 and C3H/10T1/2 adipocytes.** Mean intensity values from the microarray experiment were shown (n = 3) ( $p < 0.05$  vs C3H/10T1/2 for the respective probset).

| Probeset     | Gene     | Cell type  | Intensity |
|--------------|----------|------------|-----------|
| 1418938_at   | Dio2     | C3H/10T1/2 | 30        |
| 1418938_at   | Dio2     | 3T3 L1     | 53*       |
| 1426081_a_at | Dio2     | C3H/10T1/2 | 19        |
| 1426081_a_at | Dio2     | 3T3 L1     | 25        |
| 1460336_at   | Ppargc1a | C3H/10T1/2 | 56        |
| 1460336_at   | Ppargc1a | 3T3 L1     | 70        |



**Supplemental Table 4. Regulation of genes by RSG in 3T3-L1 (A) and C3H/10T1/2**

**(B) adipocytes over time.** Each row represents one probe set. The order of the probe sets is identical to those listed in the figures in the manuscript. Certain genes were represented by more than one probe sets. The positive values in the table are fold changes equivalent to mean probe set intensity from RSG-treated divided by that from DMSO-treated adipocytes, and the negative values are fold changes equivalent to mean probe set intensity from DMSO-treated divided by that from RSG-treated adipocytes. Fold-changes not reaching statistical significance ( $p < 0.05$ ) are shown as 0. N = 3 per time point in each cell type.

**A. 3T3-L1 Adipocytes**

| Probe set                     | Gene Symbol | Category | 1 hr | 2 hr | 4 hr | 7 hr | 24 hr | 48 hr |
|-------------------------------|-------------|----------|------|------|------|------|-------|-------|
| <b>Probe sets in Figure 2</b> |             |          |      |      |      |      |       |       |
| 1415687_a_at                  | Psap        | FAO      | 0.0  | 0.0  | 0.0  | 0.0  | 0.0   | 0.0   |
| 1415984_at                    | Acadm       | FAO      | 0.0  | 0.0  | 0.0  | 0.0  | 1.3   | 1.8   |
| 1416408_at                    | Acox1       | FAO      | 0.0  | 0.0  | 2.0  | 1.7  | 2.2   | 2.2   |
| 1416409_at                    | Acox1       | FAO      | 0.0  | 0.0  | 1.5  | 1.8  | 2.6   | 3.3   |
| 1416772_at                    | Cpt2        | FAO      | 0.0  | 0.0  | 0.0  | 1.3  | 2.0   | 2.2   |
| 1417008_at                    | Crat        | FAO      | 0.0  | 1.3  | 1.3  | 1.3  | 1.8   | 2.2   |
| 1417369_at                    | Hsd17b4     | FAO      | 0.0  | 0.0  | 1.3  | 1.3  | 1.6   | 1.7   |
| 1418321_at                    | Dci         | FAO      | 0.0  | 0.0  | 0.0  | 0.0  | 1.4   | 1.3   |
| 1418328_at                    | Cpt1b       | FAO      | 0.0  | 0.0  | 0.0  | 0.0  | 0.0   | 1.5   |
| 1418862_at                    | Echdc3      | FAO      | 0.0  | 0.0  | 0.0  | 0.0  | 0.0   | 0.0   |
| 1419261_at                    | Acad8       | FAO      | 0.0  | 0.0  | 0.0  | 0.0  | 0.0   | 0.0   |
| 1419262_at                    | Acad8       | FAO      | 0.0  | 0.0  | 0.0  | -1.3 | 0.0   | 0.0   |
| 1419367_at                    | Decr1       | FAO      | 0.0  | 0.0  | 0.0  | 0.0  | 1.6   | 1.9   |
| 1420776_a_at                  | Auh         | FAO      | 0.0  | 0.0  | 0.0  | 0.0  | 0.0   | 0.0   |
| 1422526_at                    | Acsl1       | FAO      | 0.0  | 2.0  | 2.4  | 2.6  | 2.9   | 2.9   |
| 1423883_at                    | Acsl1       | FAO      | 0.0  | 1.5  | 1.7  | 1.5  | 1.6   | 1.3   |
| 1424182_at                    | Acat1       | FAO      | 0.0  | 0.0  | 0.0  | 0.0  | 1.2   | 1.8   |
| 1424183_at                    | Acat1       | FAO      | 0.0  | 0.0  | 0.0  | 0.0  | 0.0   | 1.3   |
| 1424184_at                    | Acadvl      | FAO      | 0.0  | 0.0  | 0.0  | 0.0  | 2.0   | 2.3   |
| 1424451_at                    | MGC29978    | FAO      | 0.0  | 0.0  | 0.0  | 2.9  | 11.3  | 28.4  |
| 1425195_a_at                  | Acat2       | FAO      | 0.0  | 0.0  | 0.0  | 1.5  | 1.6   | 2.0   |
| 1426522_at                    | Hadhb       | FAO      | 0.0  | 0.0  | 0.0  | 1.3  | 3.1   | 4.0   |
| 1428082_at                    | Acsl5       | FAO      | 0.0  | 0.0  | 0.0  | 0.0  | -1.6  | 0.0   |
| 1428145_at                    | Acaa2       | FAO      | 0.0  | 0.0  | 0.0  | 0.0  | 1.7   | 3.0   |
| 1428146_s_at                  | Acaa2       | FAO      | 0.0  | 0.0  | 0.0  | 0.0  | 1.7   | 2.6   |

|              |          |            |     |     |     |      |      |      |
|--------------|----------|------------|-----|-----|-----|------|------|------|
| 1429339_a_at | Acad10   | FAO        | 0.0 | 0.0 | 0.0 | -1.4 | 0.0  | 0.0  |
| 1429581_at   | Acad9    | FAO        | 0.0 | 0.0 | 0.0 | 0.0  | 0.0  | 0.0  |
| 1435630_s_at | Acat2    | FAO        | 0.0 | 0.0 | 1.2 | 1.4  | 1.7  | 2.0  |
| 1436756_x_at | Hadhsc   | FAO        | 0.0 | 0.0 | 0.0 | 0.0  | 0.0  | 0.0  |
| 1437172_x_at | Hadhb    | FAO        | 0.0 | 0.0 | 0.0 | 1.5  | 1.5  | 2.5  |
| 1438291_x_at | Acads    | FAO        | 0.0 | 0.0 | 0.0 | 0.0  | 0.0  | -1.5 |
| 1438391_x_at | Hadh2    | FAO        | 0.0 | 0.0 | 0.0 | 0.0  | 0.0  | -1.2 |
| 1448286_at   | Hadh2    | FAO        | 0.0 | 0.0 | 0.0 | 0.0  | 0.0  | 0.0  |
| 1448382_at   | Ehhadh   | FAO        | 0.0 | 0.0 | 0.0 | 0.0  | 0.0  | 0.0  |
| 1448491_at   | Ech1     | FAO        | 0.0 | 0.0 | 0.0 | 0.0  | 1.4  | 1.7  |
| 1448544_at   | Crat     | FAO        | 0.0 | 0.0 | 1.5 | 1.4  | 1.7  | 1.3  |
| 1448717_at   | Gcdh     | FAO        | 0.0 | 0.0 | 0.0 | 0.0  | 0.0  | 0.0  |
| 1448987_at   | Acadl    | FAO        | 0.0 | 0.0 | 0.0 | 0.0  | 1.5  | 1.7  |
| 1448988_at   | Acadl    | FAO        | 0.0 | 0.0 | 0.0 | 0.0  | 0.0  | 0.0  |
| 1449443_at   | Decr1    | FAO        | 0.0 | 0.0 | 1.2 | 1.5  | 2.0  | 1.6  |
| 1449964_a_at | Mlycd    | FAO        | 0.0 | 0.0 | 0.0 | 1.3  | 2.1  | 2.6  |
| 1450643_s_at | Acsl1    | FAO        | 0.0 | 1.7 | 2.0 | 2.5  | 2.3  | 2.1  |
| 1451271_a_at | Acat1    | FAO        | 0.0 | 0.0 | 0.0 | 0.0  | 0.0  | 1.5  |
| 1451511_at   | Hibch    | FAO        | 0.0 | 0.0 | 0.0 | 0.0  | 0.0  | 0.0  |
| 1451512_s_at | Hibch    | FAO        | 0.0 | 0.0 | 0.0 | 0.0  | 1.2  | 0.0  |
| 1452173_at   | Hadha    | FAO        | 0.0 | 0.0 | 0.0 | 0.0  | 2.6  | 3.3  |
| 1452341_at   | Echs1    | FAO        | 0.0 | 0.0 | 0.0 | 0.0  | 1.3  | 1.5  |
| 1453206_at   | Acad9    | FAO        | 0.0 | 0.0 | 0.0 | 0.0  | 1.5  | 0.0  |
| 1455061_a_at | Acaa2    | FAO        | 0.0 | 0.0 | 0.0 | 0.0  | 1.5  | 3.0  |
| 1455446_x_at | Acadsb   | FAO        | 0.0 | 0.0 | 0.0 | -1.2 | -1.4 | -1.3 |
| 1455777_x_at | Hsd17b4  | FAO        | 0.0 | 0.0 | 1.3 | 0.0  | 1.2  | 1.4  |
| 1455972_x_at | Hadhsc   | FAO        | 0.0 | 0.0 | 0.0 | 0.0  | 1.4  | 1.3  |
| 1460184_at   | Hadhsc   | FAO        | 0.0 | 0.0 | 0.0 | 0.0  | 1.5  | 1.7  |
| 1460216_at   | Acads    | FAO        | 0.0 | 0.0 | 0.0 | 0.0  | 1.5  | 1.7  |
| 1460316_at   | Acsl1    | FAO        | 0.0 | 1.6 | 1.4 | 1.7  | 1.5  | 1.7  |
| 1460409_at   | Cpt1a    | FAO        | 0.0 | 0.0 | 0.0 | 0.0  | 0.0  | 0.0  |
| 1423972_at   | Etfb     | OXPHOS/FAO | 0.0 | 0.0 | 0.0 | 0.0  | 1.4  | 1.5  |
| 1428181_at   | Etfb     | OXPHOS/FAO | 0.0 | 0.0 | 0.0 | 0.0  | 1.6  | 1.7  |
| 1451084_at   | Etfdh    | OXPHOS/FAO | 0.0 | 0.0 | 0.0 | 0.0  | 2.1  | 2.2  |
| 1429709_at   | Pmpcb    | OXPHOS     | 0.0 | 0.0 | 0.0 | 0.0  | 0.0  | 0.0  |
| 1433729_x_at | Pmpcb    | OXPHOS     | 0.0 | 0.0 | 0.0 | 0.0  | 0.0  | 0.0  |
| 1434053_x_at | Atp5k    | OXPHOS     | 0.0 | 0.0 | 0.0 | 0.0  | 1.7  | 1.5  |
| 1450640_x_at | Atp5k    | OXPHOS     | 0.0 | 0.0 | 0.0 | 0.0  | 0.0  | 0.0  |
| 1415980_at   | Atp5g2   | OXPHOS     | 0.0 | 0.0 | 0.0 | 0.0  | 0.0  | 0.0  |
| 1416058_s_at | Atp5c1   | OXPHOS     | 0.0 | 0.0 | 0.0 | 0.0  | 1.3  | 0.0  |
| 1416143_at   | Atp5j    | OXPHOS     | 0.0 | 0.0 | 0.0 | 1.3  | 0.0  | 0.0  |
| 1416269_at   | Atp5j2   | OXPHOS     | 0.0 | 0.0 | 0.0 | 0.0  | 1.5  | 1.5  |
| 1416278_a_at | Atp5o    | OXPHOS     | 0.0 | 0.0 | 0.0 | 0.0  | 1.9  | 1.6  |
| 1416567_s_at | Atp5e    | OXPHOS     | 0.0 | 0.0 | 0.0 | 0.0  | 0.0  | 1.3  |
| 1416829_at   | Atp5b    | OXPHOS     | 0.0 | 0.0 | 0.0 | 0.0  | 1.3  | 1.4  |
| 1417970_at   | Atp5s    | OXPHOS     | 0.0 | 0.0 | 0.0 | 0.0  | 0.0  | -1.4 |
| 1420037_at   | Atp5a1   | OXPHOS     | 0.0 | 0.0 | 0.0 | 0.0  | 0.0  | 0.0  |
| 1422508_at   | Atp6v1a1 | OXPHOS     | 0.0 | 0.0 | 0.0 | 0.0  | 0.0  | 0.0  |

|              |               |        |     |      |      |     |      |      |
|--------------|---------------|--------|-----|------|------|-----|------|------|
| 1423111_at   | Atp5a1        | OXPHOS | 0.0 | 0.0  | 0.0  | 0.0 | 1.6  | 1.7  |
| 1423676_at   | Atp5h         | OXPHOS | 0.0 | 0.0  | 0.0  | 0.0 | 1.4  | 1.2  |
| 1423716_s_at | Atp5d         | OXPHOS | 0.0 | 0.0  | 0.0  | 0.0 | 1.6  | 1.4  |
| 1426742_at   | Atp5f1        | OXPHOS | 0.0 | 0.0  | 0.0  | 0.0 | 1.7  | 1.5  |
| 1433562_s_at | Atp5f1        | OXPHOS | 0.0 | 0.0  | 0.0  | 0.0 | 1.3  | 1.5  |
| 1435112_a_at | Atp5h         | OXPHOS | 0.0 | 0.0  | 0.0  | 0.0 | 0.0  | 0.0  |
| 1435395_s_at | Atp5j2        | OXPHOS | 0.0 | 0.0  | 0.0  | 0.0 | 1.3  | 1.3  |
| 1437164_x_at | Atp5o         | OXPHOS | 0.0 | 0.0  | 0.0  | 0.0 | 1.3  | 1.4  |
| 1438809_at   | Atp5c1        | OXPHOS | 0.0 | 0.0  | 0.0  | 0.0 | 0.0  | 0.0  |
| 1448203_at   | Atp5l         | OXPHOS | 0.0 | 0.0  | 0.0  | 0.0 | 1.4  | 1.3  |
| 1448211_at   | 0610006O14Rik | OXPHOS | 0.0 | 0.0  | 0.0  | 0.0 | -1.9 | -1.9 |
| 1449710_s_at | Atp5a1        | OXPHOS | 0.0 | 0.0  | 0.0  | 0.0 | 1.4  | 1.6  |
| 1449712_s_at | Atp6v1e1      | OXPHOS | 0.0 | 0.0  | 0.0  | 0.0 | 1.5  | 1.3  |
| 1450634_at   | Atp6v1a1      | OXPHOS | 0.0 | 0.0  | 0.0  | 0.0 | 0.0  | 0.0  |
| 1454661_at   | Atp5g3        | OXPHOS | 0.0 | 0.0  | 0.0  | 0.0 | 1.3  | 0.0  |
| 1456580_s_at | Atp5d         | OXPHOS | 0.0 | 0.0  | 0.0  | 0.0 | 1.5  | 1.4  |
| 1415966_a_at | Ndufv1        | OXPHOS | 0.0 | 0.0  | 0.0  | 0.0 | 1.5  | 1.6  |
| 1415967_at   | Ndufv1        | OXPHOS | 0.0 | 0.0  | 0.0  | 0.0 | 1.5  | 1.7  |
| 1416056_a_at | Np15          | OXPHOS | 0.0 | 0.0  | -1.2 | 0.0 | 0.0  | 0.0  |
| 1416057_at   | Np15          | OXPHOS | 0.0 | 0.0  | 0.0  | 0.0 | 1.2  | 1.2  |
| 1416285_at   | Ndufc1        | OXPHOS | 0.0 | 0.0  | 0.0  | 0.0 | 1.6  | 1.5  |
| 1416366_at   | Ndufc2        | OXPHOS | 0.0 | 0.0  | 0.0  | 1.3 | 0.0  | 0.0  |
| 1416417_a_at | Ndufb7        | OXPHOS | 0.0 | 0.0  | 0.0  | 0.0 | 1.5  | 1.4  |
| 1416495_s_at | Ndufs5        | OXPHOS | 0.0 | 0.0  | 0.0  | 0.0 | 1.4  | 1.2  |
| 1416547_at   | Ndufb3        | OXPHOS | 0.0 | 0.0  | 0.0  | 1.4 | 1.5  | 1.4  |
| 1416663_at   | Ndufa9        | OXPHOS | 0.0 | 0.0  | 0.0  | 0.0 | 1.2  | 1.4  |
| 1416834_x_at | Ndufb2        | OXPHOS | 0.0 | 0.0  | 0.0  | 1.3 | 1.4  | 1.4  |
| 1417102_a_at | Ndufb5        | OXPHOS | 0.0 | 0.0  | 0.0  | 0.0 | 1.3  | 1.4  |
| 1417285_a_at | Ndufa5        | OXPHOS | 0.0 | 0.0  | 0.0  | 0.0 | 1.5  | 1.3  |
| 1417286_at   | Ndufa5        | OXPHOS | 0.0 | 0.0  | 0.0  | 0.0 | 1.7  | 0.0  |
| 1417368_s_at | Ndufa2        | OXPHOS | 0.0 | 0.0  | 0.0  | 0.0 | 0.0  | 0.0  |
| 1418068_at   | Ndufa10       | OXPHOS | 0.0 | 0.0  | 0.0  | 0.0 | 0.0  | 0.0  |
| 1418117_at   | Ndufs4        | OXPHOS | 0.0 | 0.0  | 0.0  | 0.0 | 0.0  | 0.0  |
| 1418814_s_at | 2410011G03Rik | OXPHOS | 0.0 | -1.4 | 0.0  | 0.0 | 1.6  | 0.0  |
| 1422241_a_at | Ndufa1        | OXPHOS | 0.0 | 0.0  | 0.0  | 0.0 | 1.3  | 1.4  |
| 1422976_x_at | Ndufa7        | OXPHOS | 0.0 | 0.0  | 0.0  | 0.0 | 0.0  | 0.0  |
| 1423692_at   | Ndufa8        | OXPHOS | 0.0 | 0.0  | 0.0  | 1.3 | 1.6  | 1.6  |
| 1423737_at   | Ndufs3        | OXPHOS | 0.0 | 0.0  | 0.0  | 0.0 | 1.3  | 1.2  |
| 1423907_a_at | Ndufs8        | OXPHOS | 0.0 | 0.0  | 0.0  | 0.0 | 1.4  | 1.5  |
| 1424085_at   | Ndufa4        | OXPHOS | 0.0 | 0.0  | 0.0  | 0.0 | 1.8  | 0.0  |
| 1424313_a_at | Ndufs7        | OXPHOS | 0.0 | 0.0  | 0.0  | 0.0 | 1.2  | 0.0  |
| 1424628_a_at | 1500032D16Rik | OXPHOS | 0.0 | 0.0  | 0.0  | 0.0 | 1.4  | 1.3  |
| 1425143_a_at | Ndufs1        | OXPHOS | 0.0 | 0.0  | 0.0  | 0.0 | 1.8  | 1.9  |
| 1428075_at   | Ndufb4        | OXPHOS | 0.0 | 0.0  | 0.0  | 0.0 | 0.0  | 0.0  |
| 1428076_s_at | Ndufb4        | OXPHOS | 0.0 | 0.0  | 0.0  | 0.0 | 0.0  | 0.0  |
| 1428159_s_at | Ndufab1       | OXPHOS | 0.0 | 0.0  | 0.0  | 1.5 | 1.6  | 1.3  |
| 1428160_at   | Ndufab1       | OXPHOS | 0.0 | 0.0  | 0.0  | 0.0 | 0.0  | 1.6  |
| 1428179_at   | Ndufv2        | OXPHOS | 0.0 | 0.0  | 0.0  | 0.0 | 1.5  | 1.3  |

|              |               |        |     |     |     |     |     |     |
|--------------|---------------|--------|-----|-----|-----|-----|-----|-----|
| 1428322_a_at | Ndufb10       | OXPHOS | 0.0 | 0.0 | 0.0 | 0.0 | 1.6 | 1.5 |
| 1428360_x_at | Ndufa7        | OXPHOS | 0.0 | 0.0 | 0.0 | 0.0 | 0.0 | 0.0 |
| 1428464_at   | Ndufa3        | OXPHOS | 0.0 | 0.0 | 0.0 | 0.0 | 1.3 | 1.6 |
| 1429708_at   | Ndufa11       | OXPHOS | 0.0 | 0.0 | 0.0 | 0.0 | 1.6 | 0.0 |
| 1430713_s_at | Grim19        | OXPHOS | 0.0 | 0.0 | 0.0 | 0.0 | 0.0 | 0.0 |
| 1433513_x_at | 2410011G03Rik | OXPHOS | 0.0 | 0.0 | 0.0 | 0.0 | 1.3 | 0.0 |
| 1434212_at   | Ndufs8        | OXPHOS | 0.0 | 0.0 | 0.0 | 0.0 | 0.0 | 1.4 |
| 1434213_x_at | Ndufs8        | OXPHOS | 0.0 | 0.0 | 0.0 | 0.0 | 0.0 | 1.3 |
| 1434579_x_at | Ndufs8        | OXPHOS | 0.0 | 0.0 | 0.0 | 0.0 | 1.4 | 1.6 |
| 1434856_at   | Ndufs1        | OXPHOS | 0.0 | 0.0 | 0.0 | 0.0 | 0.0 | 1.3 |
| 1435934_at   | Ndufab1       | OXPHOS | 0.0 | 0.0 | 0.0 | 0.0 | 0.0 | 0.0 |
| 1436567_a_at | Ndufa7        | OXPHOS | 0.0 | 0.0 | 0.0 | 0.0 | 0.0 | 0.0 |
| 1436803_a_at | Ndufb9        | OXPHOS | 0.0 | 0.0 | 0.0 | 0.0 | 1.4 | 1.3 |
| 1438159_x_at | Ndufv2        | OXPHOS | 0.0 | 0.0 | 0.0 | 0.0 | 1.6 | 1.8 |
| 1447919_x_at | Ndufab1       | OXPHOS | 0.0 | 0.0 | 0.0 | 1.3 | 1.5 | 1.5 |
| 1448198_a_at | Ndufb8        | OXPHOS | 0.0 | 0.0 | 0.0 | 0.0 | 1.4 | 1.2 |
| 1448284_a_at | Ndufc1        | OXPHOS | 0.0 | 0.0 | 0.0 | 0.0 | 1.5 | 1.3 |
| 1448331_at   | Ndufb7        | OXPHOS | 0.0 | 0.0 | 0.0 | 1.3 | 1.5 | 1.3 |
| 1448427_at   | Ndufa6        | OXPHOS | 0.0 | 0.0 | 0.0 | 0.0 | 1.3 | 0.0 |
| 1448483_a_at | Ndufb2        | OXPHOS | 0.0 | 0.0 | 0.0 | 0.0 | 1.3 | 1.2 |
| 1448589_at   | Ndufb5        | OXPHOS | 0.0 | 0.0 | 0.0 | 0.0 | 1.3 | 1.4 |
| 1448934_at   | Ndufa10       | OXPHOS | 0.0 | 0.0 | 0.0 | 0.0 | 1.3 | 0.0 |
| 1448959_at   | Ndufs4        | OXPHOS | 0.0 | 0.0 | 0.0 | 0.0 | 0.0 | 0.0 |
| 1450818_a_at | Ndufa7        | OXPHOS | 0.0 | 0.0 | 0.0 | 0.0 | 0.0 | 0.0 |
| 1451096_at   | Ndufs2        | OXPHOS | 0.0 | 0.0 | 0.0 | 0.0 | 1.2 | 0.0 |
| 1451312_at   | Ndufs7        | OXPHOS | 0.0 | 0.0 | 0.0 | 0.0 | 1.4 | 1.3 |
| 1452184_at   | Ndufb9        | OXPHOS | 0.0 | 0.0 | 0.0 | 0.0 | 1.4 | 1.2 |
| 1452692_a_at | Ndufv2        | OXPHOS | 0.0 | 0.0 | 0.0 | 0.0 | 1.4 | 1.3 |
| 1452790_x_at | Ndufa3        | OXPHOS | 0.0 | 0.0 | 0.0 | 0.0 | 1.5 | 1.7 |
| 1455036_s_at | Ndufc2        | OXPHOS | 0.0 | 0.0 | 0.0 | 1.2 | 0.0 | 0.0 |
| 1455283_x_at | Ndufs8        | OXPHOS | 0.0 | 0.0 | 0.0 | 0.0 | 1.4 | 1.5 |
| 1455749_x_at | Ndufa7        | OXPHOS | 0.0 | 0.0 | 0.0 | 0.0 | 1.3 | 1.4 |
| 1455806_x_at | 2410011G03Rik | OXPHOS | 0.0 | 0.0 | 0.0 | 0.0 | 1.4 | 0.0 |
| 1455911_x_at | Np15          | OXPHOS | 0.0 | 0.0 | 0.0 | 0.0 | 0.0 | 1.2 |
| 1456015_x_at | Ndufv1        | OXPHOS | 0.0 | 0.0 | 0.0 | 0.0 | 1.5 | 1.7 |
| 1415933_a_at | Cox5a         | OXPHOS | 0.0 | 0.0 | 0.0 | 0.0 | 1.5 | 1.5 |
| 1415970_at   | Cox6c         | OXPHOS | 0.0 | 0.0 | 0.0 | 0.0 | 1.3 | 0.0 |
| 1416112_at   | Cox8a         | OXPHOS | 0.0 | 0.0 | 0.0 | 0.0 | 1.4 | 1.3 |
| 1416565_at   | Cox6b1        | OXPHOS | 0.0 | 0.0 | 0.0 | 0.0 | 1.7 | 1.4 |
| 1416604_at   | Cyc1          | OXPHOS | 0.0 | 0.0 | 0.0 | 0.0 | 1.8 | 1.8 |
| 1416902_a_at | Cox5b         | OXPHOS | 0.0 | 0.0 | 0.0 | 0.0 | 1.5 | 1.7 |
| 1416970_a_at | Cox7a2        | OXPHOS | 0.0 | 0.0 | 0.0 | 0.0 | 1.4 | 1.4 |
| 1416971_at   | Cox7a2        | OXPHOS | 0.0 | 0.0 | 0.0 | 0.0 | 1.4 | 1.5 |
| 1417417_a_at | Cox6a1        | OXPHOS | 0.0 | 0.0 | 0.0 | 0.0 | 1.3 | 1.3 |
| 1417418_s_at | Cox6a1        | OXPHOS | 0.0 | 0.0 | 0.0 | 0.0 | 1.3 | 1.6 |
| 1418709_at   | Cox7a1        | OXPHOS | 0.0 | 0.0 | 0.0 | 0.0 | 2.3 | 7.2 |
| 1426693_x_at | Cox15         | OXPHOS | 0.0 | 0.0 | 0.0 | 0.0 | 0.0 | 1.3 |
| 1432264_x_at | Cox7a2l       | OXPHOS | 0.0 | 0.0 | 0.0 | 0.0 | 1.3 | 1.3 |

|              |               |            |     |      |      |      |     |     |
|--------------|---------------|------------|-----|------|------|------|-----|-----|
| 1434491_a_at | Cox6c         | OXPHOS     | 0.0 | 0.0  | 0.0  | 0.0  | 0.0 | 0.0 |
| 1435613_x_at | Cox5b         | OXPHOS     | 0.0 | 0.0  | 0.0  | 0.0  | 1.5 | 1.5 |
| 1436149_at   | Cox5b         | OXPHOS     | 0.0 | 0.0  | -1.4 | 0.0  | 1.4 | 0.0 |
| 1436409_at   | Cox8a         | OXPHOS     | 0.0 | 0.0  | 0.0  | 0.0  | 0.0 | 0.0 |
| 1436757_a_at | Cox6b1        | OXPHOS     | 0.0 | 0.0  | 0.0  | 0.0  | 1.4 | 1.4 |
| 1437982_x_at | Cox15         | OXPHOS     | 0.0 | 0.0  | 0.0  | 0.0  | 0.0 | 0.0 |
| 1439267_x_at | Cox5a         | OXPHOS     | 0.0 | 0.0  | 0.0  | 1.8  | 1.7 | 0.0 |
| 1448112_at   | Cox7c         | OXPHOS     | 0.0 | -1.3 | 0.0  | -1.3 | 0.0 | 0.0 |
| 1448153_at   | Cox5a         | OXPHOS     | 0.0 | 0.0  | 0.0  | 0.0  | 1.9 | 1.8 |
| 1448222_x_at | Cox8a         | OXPHOS     | 0.0 | 0.0  | 0.0  | 0.0  | 1.4 | 1.4 |
| 1448322_a_at | Cox4i1        | OXPHOS     | 0.0 | 0.0  | 0.0  | 0.0  | 0.0 | 1.2 |
| 1449218_at   | Cox8b         | OXPHOS     | 0.0 | 0.0  | 0.0  | 0.0  | 0.0 | 4.1 |
| 1452146_a_at | Cox15         | OXPHOS     | 0.0 | 0.0  | 0.0  | 0.0  | 0.0 | 0.0 |
| 1454716_x_at | Cox5b         | OXPHOS     | 0.0 | 0.0  | 0.0  | 0.0  | 1.6 | 1.7 |
| 1455167_at   | Cox8c         | OXPHOS     | 0.0 | 0.0  | 0.0  | 0.0  | 0.0 | 0.0 |
| 1456588_x_at | Cox5b         | OXPHOS     | 0.0 | 0.0  | 0.0  | 0.0  | 1.4 | 1.4 |
| 1416337_at   | Uqcrb         | OXPHOS     | 0.0 | 0.0  | 0.0  | 0.0  | 1.4 | 1.6 |
| 1424364_a_at | 1110020P15Rik | OXPHOS     | 0.0 | 0.0  | 0.0  | 0.0  | 2.1 | 1.8 |
| 1427880_at   | 1500040F11Rik | OXPHOS     | 0.0 | 0.0  | 0.0  | 0.0  | 0.0 | 0.0 |
| 1428631_a_at | Uqcrc2        | OXPHOS     | 0.0 | 0.0  | 0.0  | 0.0  | 1.5 | 1.3 |
| 1428782_a_at | Uqcrc1        | OXPHOS     | 0.0 | 0.0  | 0.0  | 0.0  | 1.4 | 1.5 |
| 1430326_s_at | 1500040F11Rik | OXPHOS     | 0.0 | 0.0  | 0.0  | 0.0  | 1.9 | 2.1 |
| 1435757_a_at | Uqcrc2        | OXPHOS     | 0.0 | 0.0  | 0.0  | 0.0  | 1.4 | 1.3 |
| 1448292_at   | Uqcr          | OXPHOS     | 0.0 | 0.0  | 0.0  | 0.0  | 1.6 | 1.7 |
| 1450968_at   | Uqcrrs1       | OXPHOS     | 0.0 | 0.0  | 0.0  | 0.0  | 1.7 | 1.5 |
| 1452133_at   | Uqcrh         | OXPHOS     | 0.0 | 0.0  | 0.0  | 0.0  | 1.2 | 1.2 |
| 1452613_at   | 1500040F11Rik | OXPHOS     | 0.0 | 0.0  | 0.0  | 0.0  | 0.0 | 0.0 |
| 1455997_a_at | Uqcrb         | OXPHOS     | 0.0 | 0.0  | 0.0  | 0.0  | 1.5 | 1.2 |
| 1422483_a_at | Cycs          | OXPHOS     | 0.0 | 0.0  | 1.6  | 2.5  | 3.6 | 3.2 |
| 1422484_at   | Cycs          | OXPHOS     | 0.0 | 0.0  | 1.6  | 2.2  | 3.8 | 3.3 |
| 1418005_at   | Sdhb          | OXPHOS/TCA | 0.0 | 0.0  | 0.0  | 0.0  | 1.5 | 1.4 |
| 1426688_at   | Sdha          | OXPHOS/TCA | 0.0 | 0.0  | 0.0  | 0.0  | 1.3 | 1.5 |
| 1426689_s_at | Sdha          | OXPHOS/TCA | 0.0 | 0.0  | 0.0  | 0.0  | 1.3 | 1.5 |
| 1428235_at   | Sdhd          | OXPHOS/TCA | 0.0 | 0.0  | 0.0  | 1.3  | 1.6 | 1.6 |
| 1435986_x_at | Sdhc          | OXPHOS/TCA | 0.0 | 0.0  | 0.0  | 0.0  | 1.7 | 0.0 |
| 1437489_x_at | Sdhd          | OXPHOS/TCA | 0.0 | 0.0  | 0.0  | 0.0  | 1.5 | 1.7 |
| 1448630_a_at | Sdhc          | OXPHOS/TCA | 0.0 | 0.0  | 0.0  | 0.0  | 1.3 | 0.0 |
| 1415891_at   | Suclg1        | TCA        | 0.0 | 0.0  | 0.0  | 0.0  | 1.3 | 1.3 |
| 1416090_at   | Pdhb          | TCA        | 0.0 | 0.0  | 0.0  | 1.2  | 1.8 | 1.7 |
| 1416383_a_at | Pcx           | TCA        | 0.0 | 0.0  | 0.0  | 1.3  | 2.0 | 2.0 |
| 1416478_a_at | Mdh2          | TCA        | 0.0 | 0.0  | 0.0  | 0.0  | 1.6 | 1.6 |
| 1416788_a_at | Idh3g         | TCA        | 0.0 | 0.0  | 0.0  | 0.0  | 1.3 | 1.3 |
| 1416789_at   | Idh3g         | TCA        | 0.0 | 0.0  | 0.0  | 0.0  | 0.0 | 1.4 |
| 1417273_at   | Pdk4          | TCA        | 2.5 | 1.8  | 0.0  | 0.0  | 3.6 | 6.2 |
| 1418560_at   | Pdha1         | TCA        | 0.0 | 0.0  | 0.0  | 0.0  | 1.2 | 1.5 |
| 1418885_a_at | Idh3b         | TCA        | 0.0 | 0.0  | 0.0  | 0.0  | 1.6 | 1.6 |
| 1418886_s_at | Idh3b         | TCA        | 0.0 | 0.0  | -1.2 | 0.0  | 1.5 | 1.6 |
| 1422500_at   | Idh3a         | TCA        | 0.0 | 1.5  | 1.4  | 1.6  | 2.4 | 2.2 |

|              |               |             |     |     |      |      |      |      |
|--------------|---------------|-------------|-----|-----|------|------|------|------|
| 1422501_s_at | Idh3a         | TCA         | 0.0 | 1.3 | 1.7  | 1.9  | 2.5  | 2.4  |
| 1422577_at   | Cs            | TCA         | 0.0 | 0.0 | 0.0  | 0.0  | 1.9  | 2.7  |
| 1422578_at   | Cs            | TCA         | 0.0 | 0.0 | 0.0  | 0.0  | 1.7  | 1.8  |
| 1423159_at   | Dld           | TCA         | 0.0 | 0.0 | 0.0  | 0.0  | 1.5  | 1.8  |
| 1423710_at   | Dlst          | TCA         | 0.0 | 0.0 | 0.0  | 0.0  | 1.6  | 2.0  |
| 1423747_a_at | Pdk1          | TCA         | 0.0 | 0.0 | 0.0  | 0.0  | 0.0  | 2.5  |
| 1423748_at   | Pdk1          | TCA         | 0.0 | 0.0 | 0.0  | 0.0  | 1.9  | 2.6  |
| 1424828_a_at | Fh1           | TCA         | 0.0 | 0.0 | 0.0  | 0.0  | 0.0  | 1.3  |
| 1425615_a_at | 1810010O14Rik | TCA         | 0.0 | 0.0 | 0.0  | -1.3 | -1.5 | 0.0  |
| 1426264_at   | Dlat          | TCA         | 0.0 | 0.0 | 0.0  | 0.0  | 2.2  | 2.8  |
| 1426265_x_at | Dlat          | TCA         | 0.0 | 0.0 | 0.0  | 1.3  | 2.5  | 2.9  |
| 1426410_at   | Pdk3          | TCA         | 0.0 | 0.0 | -1.3 | 0.0  | -1.9 | -2.1 |
| 1427441_a_at | Suc1g2        | TCA         | 0.0 | 0.0 | 0.0  | 0.0  | 0.0  | 0.0  |
| 1431011_at   | Dlst          | TCA         | 0.0 | 0.0 | 0.0  | 0.0  | 0.0  | 0.0  |
| 1432016_a_at | Idh3a         | TCA         | 0.0 | 0.0 | 1.4  | 1.7  | 2.2  | 2.4  |
| 1433984_a_at | Mdh2          | TCA         | 0.0 | 0.0 | 0.0  | 0.0  | 1.2  | 1.2  |
| 1436934_s_at | Aco2          | TCA         | 0.0 | 0.0 | 0.0  | 0.0  | 2.1  | 2.5  |
| 1448214_at   | Pdhhb         | TCA         | 0.0 | 0.0 | 0.0  | 1.3  | 1.9  | 1.7  |
| 1448825_at   | Pdk2          | TCA         | 0.0 | 0.0 | 0.0  | 0.0  | 1.4  | 1.7  |
| 1449137_at   | Pdha1         | TCA         | 0.0 | 0.0 | 0.0  | 0.0  | 1.5  | 1.6  |
| 1450048_a_at | Idh2          | TCA         | 0.0 | 0.0 | 0.0  | 0.0  | 0.0  | 0.0  |
| 1450667_a_at | Cs            | TCA         | 0.0 | 0.0 | 0.0  | 0.0  | 1.7  | 1.9  |
| 1451002_at   | Aco2          | TCA         | 0.0 | 0.0 | 0.0  | 0.0  | 1.8  | 2.0  |
| 1451274_at   | Ogdh          | TCA         | 0.0 | 0.0 | 0.0  | 0.0  | 1.9  | 1.9  |
| 1452005_at   | Dlat          | TCA         | 0.0 | 0.0 | 0.0  | 0.0  | 1.4  | 1.7  |
| 1452206_at   | Suc1a2        | TCA         | 0.0 | 0.0 | 0.0  | 0.0  | 1.3  | 1.5  |
| 1417956_at   | Cidea         | UCP         | 0.0 | 0.0 | 0.0  | 0.0  | 2.9  | 7.6  |
| 1418197_at   | Ucp1          | UCP         | 0.0 | 0.0 | 0.0  | 0.0  | 0.0  | 0.0  |
| 1420657_at   | Ucp3          | UCP         | 0.0 | 1.6 | 1.4  | 1.6  | 1.4  | 0.0  |
| 1420658_at   | Ucp3          | UCP         | 0.0 | 2.7 | 0.0  | 0.0  | 0.0  | 1.8  |
| 1448188_at   | Ucp2          | UCP         | 0.0 | 0.0 | 1.3  | 1.6  | 1.5  | 1.5  |
| 1416300_a_at | Slc25a3       | ATP_Shuttle | 0.0 | 0.0 | 0.0  | 0.0  | 1.3  | 1.2  |
| 1417434_at   | Gpd2          | ATP_Shuttle | 0.0 | 0.0 | 0.0  | 0.0  | 0.0  | 0.0  |
| 1423108_at   | Slc25a20      | ATP_Shuttle | 0.0 | 0.0 | 0.0  | 0.0  | 2.1  | 2.8  |
| 1423109_s_at | Slc25a20      | ATP_Shuttle | 0.0 | 0.0 | 0.0  | 0.0  | 1.5  | 1.9  |
| 1423772_x_at | Slc25a5       | ATP_Shuttle | 0.0 | 0.0 | 0.0  | 1.3  | 1.3  | 0.0  |
| 1424735_at   | Slc25a25      | ATP_Shuttle | 0.0 | 1.9 | 2.3  | 2.3  | 2.0  | 2.0  |
| 1427483_at   | Slc25a24      | ATP_Shuttle | 0.0 | 0.0 | 0.0  | -1.8 | -2.2 | -2.1 |
| 1428929_s_at | Slc25a26      | ATP_Shuttle | 0.0 | 0.0 | 0.0  | 0.0  | 1.7  | 2.2  |
| 1430542_a_at | Slc25a5       | ATP_Shuttle | 0.0 | 0.0 | 0.0  | 1.3  | 1.7  | 0.0  |
| 1434801_x_at | Slc25a5       | ATP_Shuttle | 0.0 | 0.0 | 0.0  | 0.0  | 1.4  | 0.0  |
| 1436874_x_at | Slc25a5       | ATP_Shuttle | 0.0 | 0.0 | 0.0  | 0.0  | 1.5  | 0.0  |
| 1438360_x_at | Slc25a5       | ATP_Shuttle | 0.0 | 0.0 | 0.0  | 0.0  | 0.0  | 0.0  |
| 1438546_x_at | Slc25a5       | ATP_Shuttle | 0.0 | 0.0 | 0.0  | 1.3  | 1.4  | 1.3  |
| 1438922_x_at | Slc25a5       | ATP_Shuttle | 0.0 | 0.0 | 0.0  | 0.0  | 0.0  | 0.0  |
| 1415990_at   | Vdac2         | VDAC        | 0.0 | 0.0 | 0.0  | 0.0  | 1.4  | 1.2  |
| 1415998_at   | Vdac1         | VDAC        | 0.0 | 0.0 | 0.0  | 0.0  | 1.3  | 1.6  |
| 1416175_a_at | Vdac3         | VDAC        | 0.0 | 0.0 | 0.0  | 0.0  | 0.0  | 0.0  |

|                                |         |                      |     |      |     |      |      |      |
|--------------------------------|---------|----------------------|-----|------|-----|------|------|------|
| 1436992_x_at                   | Vdac1   | VDAC                 | 0.0 | 0.0  | 0.0 | 0.0  | 1.3  | 1.4  |
| 1437192_x_at                   | Vdac1   | VDAC                 | 0.0 | 0.0  | 0.0 | 0.0  | 1.4  | 0.0  |
| 1437947_x_at                   | Vdac1   | VDAC                 | 0.0 | 0.0  | 0.0 | 0.0  | 0.0  | 0.0  |
| <b>Probe sets in Figure 3A</b> |         |                      |     |      |     |      |      |      |
| 1417066_at                     | Cabc1   | MitHSP               | 0.0 | 0.0  | 0.0 | -1.3 | 0.0  | 1.6  |
| 1417101_at                     | Hspa2   | MitHSP               | 0.0 | 0.0  | 0.0 | 0.0  | 0.0  | 0.0  |
| 1417320_at                     | Grpel1  | MitHSP               | 0.0 | 0.0  | 0.0 | 1.4  | 1.7  | 1.5  |
| 1418503_at                     | Hspa9a  | MitHSP               | 0.0 | 0.0  | 0.0 | 0.0  | 0.0  | 1.5  |
| 1418504_at                     | Hspa9a  | MitHSP               | 0.0 | 0.0  | 0.0 | 0.0  | 1.3  | 1.7  |
| 1420629_a_at                   | Dnaja3  | MitHSP               | 0.0 | 0.0  | 0.0 | 0.0  | 1.4  | 1.4  |
| 1422579_at                     | Hspe1   | MitHSP               | 0.0 | 0.0  | 0.0 | 1.3  | 1.3  | 0.0  |
| 1426351_at                     | Hspd1   | MitHSP               | 0.0 | 0.0  | 0.0 | 0.0  | 1.5  | 1.4  |
| 1431274_a_at                   | Hspa9a  | MitHSP               | 0.0 | 0.0  | 0.0 | 0.0  | 1.7  | 0.0  |
| 1449935_a_at                   | Dnaja3  | MitHSP               | 0.0 | 0.0  | 0.0 | 1.2  | 1.7  | 1.6  |
| 1450668_s_at                   | Hspe1   | MitHSP               | 0.0 | 0.0  | 1.4 | 1.4  | 1.4  | 1.4  |
| 1452262_at                     | Grpel2  | MitHSP               | 0.0 | 0.0  | 0.0 | 0.0  | 0.0  | 1.2  |
| 1415681_at                     | Mrpl43  | MitRibosomal protein | 0.0 | 0.0  | 0.0 | 0.0  | 1.3  | 0.0  |
| 1415690_at                     | Mrpl27  | MitRibosomal protein | 0.0 | 0.0  | 0.0 | 0.0  | 0.0  | 0.0  |
| 1415762_x_at                   | Mrpl52  | MitRibosomal protein | 0.0 | 0.0  | 0.0 | 0.0  | -1.3 | -1.5 |
| 1416284_at                     | Mrpl28  | MitRibosomal protein | 0.0 | 0.0  | 0.0 | 0.0  | 0.0  | 0.0  |
| 1416349_at                     | Mrpl34  | MitRibosomal protein | 0.0 | 0.0  | 0.0 | 0.0  | 1.5  | 1.4  |
| 1416510_at                     | Mrpl4   | MitRibosomal protein | 0.0 | 0.0  | 0.0 | 0.0  | 1.4  | 0.0  |
| 1416595_at                     | Mrps22  | MitRibosomal protein | 0.0 | 0.0  | 0.0 | 0.0  | 0.0  | 0.0  |
| 1416877_a_at                   | Mrpl51  | MitRibosomal protein | 0.0 | 0.0  | 0.0 | 0.0  | 1.4  | 1.2  |
| 1416879_at                     | Mrpl51  | MitRibosomal protein | 0.0 | 0.0  | 0.0 | 0.0  | 0.0  | 0.0  |
| 1416984_at                     | Mrps18a | MitRibosomal protein | 0.0 | 1.2  | 0.0 | 0.0  | 0.0  | -1.3 |
| 1417966_at                     | Mrpl39  | MitRibosomal protein | 0.0 | 0.0  | 0.0 | 0.0  | 0.0  | 0.0  |
| 1418112_at                     | Mrpl10  | MitRibosomal protein | 0.0 | 0.0  | 0.0 | 0.0  | 0.0  | 0.0  |
| 1418137_at                     | Mrp63   | MitRibosomal protein | 0.0 | 0.0  | 0.0 | 0.0  | 0.0  | 0.0  |
| 1418716_at                     | Mrps25  | MitRibosomal protein | 0.0 | -1.5 | 0.0 | 0.0  | -1.3 | -1.3 |
| 1419362_at                     | Mrpl35  | MitRibosomal protein | 1.7 | 0.0  | 0.0 | 0.0  | 0.0  | 0.0  |
| 1419363_a_at                   | Mrpl35  | MitRibosomal protein | 0.0 | 0.0  | 0.0 | 0.0  | 0.0  | 0.0  |
| 1420488_at                     | Mrps14  | MitRibosomal protein | 0.0 | 0.0  | 0.0 | 0.0  | 0.0  | 1.5  |
| 1420489_at                     | Mrps14  | MitRibosomal protein | 0.0 | 0.0  | 0.0 | 0.0  | 0.0  | 0.0  |
| 1420845_at                     | Mrps2   | MitRibosomal protein | 0.0 | 0.0  | 0.0 | 0.0  | 0.0  | 1.6  |
| 1420846_at                     | Mrps2   | MitRibosomal protein | 0.0 | 0.0  | 1.3 | 1.3  | 1.3  | 1.5  |
| 1421874_a_at                   | Mrps23  | MitRibosomal protein | 0.0 | 0.0  | 0.0 | 0.0  | 0.0  | 1.5  |
| 1421875_a_at                   | Mrps23  | MitRibosomal protein | 0.0 | 0.0  | 0.0 | 0.0  | 1.3  | 1.4  |
| 1421914_s_at                   | Mrpl19  | MitRibosomal protein | 0.0 | 0.0  | 0.0 | 0.0  | 0.0  | 0.0  |
| 1421971_a_at                   | Mrps34  | MitRibosomal protein | 0.0 | 0.0  | 0.0 | 1.3  | 1.5  | 1.3  |
| 1422451_at                     | Mrps21  | MitRibosomal protein | 0.0 | 0.0  | 0.0 | 0.0  | 0.0  | 0.0  |
| 1422819_at                     | Mrpl36  | MitRibosomal protein | 0.0 | 0.0  | 0.0 | 0.0  | 0.0  | 0.0  |
| 1423219_a_at                   | Mrpl49  | MitRibosomal protein | 0.0 | 0.0  | 0.0 | 0.0  | 1.2  | 0.0  |
| 1423242_at                     | Mrps36  | MitRibosomal protein | 0.0 | 0.0  | 0.0 | 0.0  | 0.0  | 0.0  |
| 1423492_at                     | Mrpl45  | MitRibosomal protein | 0.0 | 0.0  | 0.0 | 0.0  | 1.4  | 0.0  |
| 1423764_s_at                   | Mrpl37  | MitRibosomal protein | 0.0 | 0.0  | 0.0 | 0.0  | 0.0  | 0.0  |
| 1423857_at                     | Mrpl30  | MitRibosomal protein | 0.0 | 0.0  | 0.0 | 0.0  | 0.0  | 0.0  |
| 1424164_at                     | Mrpl50  | MitRibosomal protein | 0.0 | 0.0  | 0.0 | 0.0  | 0.0  | 0.0  |

|              |         |                      |      |      |     |      |      |      |
|--------------|---------|----------------------|------|------|-----|------|------|------|
| 1424204_at   | Mrpl13  | MitRibosomal protein | 0.0  | 0.0  | 0.0 | 0.0  | 0.0  | -1.3 |
| 1424372_at   | Mrpl32  | MitRibosomal protein | 0.0  | 0.0  | 0.0 | 0.0  | 0.0  | 0.0  |
| 1424440_at   | Mrps6   | MitRibosomal protein | 0.0  | 0.0  | 0.0 | 0.0  | 0.0  | -1.6 |
| 1425189_a_at | Mrpl15  | MitRibosomal protein | 0.0  | 0.0  | 0.0 | 0.0  | 1.5  | 0.0  |
| 1426651_at   | Mrpl44  | MitRibosomal protein | 0.0  | 0.0  | 0.0 | 0.0  | 0.0  | 0.0  |
| 1427158_at   | Mrps30  | MitRibosomal protein | 0.0  | 0.0  | 0.0 | 0.0  | 0.0  | 0.0  |
| 1427173_a_at | Mrps33  | MitRibosomal protein | 0.0  | 0.0  | 0.0 | 0.0  | 0.0  | 0.0  |
| 1427297_at   | Mrpl9   | MitRibosomal protein | 0.0  | 0.0  | 0.0 | 0.0  | 0.0  | 0.0  |
| 1427901_at   | Mrps18c | MitRibosomal protein | 0.0  | 0.0  | 0.0 | 0.0  | 0.0  | 0.0  |
| 1428302_at   | Mrpl48  | MitRibosomal protein | 0.0  | 0.0  | 0.0 | 0.0  | 0.0  | 0.0  |
| 1428709_a_at | Mrpl24  | MitRibosomal protein | 0.0  | 0.0  | 0.0 | 0.0  | 0.0  | -1.3 |
| 1429054_at   | Mrpl47  | MitRibosomal protein | 0.0  | 0.0  | 0.0 | 1.5  | 1.6  | 0.0  |
| 1429453_a_at | Mrpl55  | MitRibosomal protein | 0.0  | 0.0  | 0.0 | 1.3  | 1.4  | 1.8  |
| 1430976_a_at | Mrpl9   | MitRibosomal protein | 0.0  | 0.0  | 0.0 | 0.0  | 0.0  | 1.3  |
| 1433878_at   | Mrps26  | MitRibosomal protein | 0.0  | 0.0  | 0.0 | 1.3  | 0.0  | 0.0  |
| 1434971_x_at | Mrpl15  | MitRibosomal protein | 0.0  | 0.0  | 0.0 | 0.0  | 1.7  | 1.6  |
| 1435232_x_at | Mrpl15  | MitRibosomal protein | 0.0  | 0.0  | 0.0 | 0.0  | 1.3  | 1.4  |
| 1435843_x_at | Mrps9   | MitRibosomal protein | 0.0  | 0.0  | 0.0 | 0.0  | 0.0  | 0.0  |
| 1435966_x_at | Mrpl13  | MitRibosomal protein | 0.0  | 0.0  | 0.0 | 0.0  | 0.0  | 0.0  |
| 1435995_at   | Mrpl22  | MitRibosomal protein | 0.0  | 0.0  | 0.0 | 0.0  | 0.0  | -1.3 |
| 1437131_x_at | Mrpl11  | MitRibosomal protein | 0.0  | 0.0  | 0.0 | 0.0  | 0.0  | 0.0  |
| 1437391_x_at | Mrpl44  | MitRibosomal protein | 0.0  | -1.2 | 0.0 | 0.0  | 0.0  | 0.0  |
| 1437622_x_at | Mrpl28  | MitRibosomal protein | 0.0  | 0.0  | 0.0 | 0.0  | 0.0  | 0.0  |
| 1437839_x_at | Mrpl11  | MitRibosomal protein | 0.0  | 0.0  | 0.0 | 0.0  | 0.0  | 0.0  |
| 1437997_x_at | Mrpl48  | MitRibosomal protein | 0.0  | 0.0  | 0.0 | 0.0  | 0.0  | 0.0  |
| 1438014_at   | Mrpl34  | MitRibosomal protein | 0.0  | 0.0  | 0.0 | 0.0  | 0.0  | 0.0  |
| 1438563_s_at | Mrps24  | MitRibosomal protein | 0.0  | 0.0  | 0.0 | 0.0  | 0.0  | 0.0  |
| 1439210_at   | Mrps9   | MitRibosomal protein | 0.0  | 4.2  | 0.0 | 0.0  | 0.0  | 0.0  |
| 1447961_s_at | Mrpl38  | MitRibosomal protein | 0.0  | 0.0  | 0.0 | 0.0  | 0.0  | 0.0  |
| 1448373_at   | Mrpl18  | MitRibosomal protein | 0.0  | 0.0  | 0.0 | 1.3  | 1.5  | 1.2  |
| 1448488_at   | Mrps5   | MitRibosomal protein | 0.0  | 0.0  | 0.0 | 1.3  | 0.0  | 0.0  |
| 1448699_at   | Mrpl54  | MitRibosomal protein | 0.0  | 0.0  | 0.0 | 0.0  | 0.0  | 0.0  |
| 1448799_s_at | Mrps12  | MitRibosomal protein | 0.0  | 0.0  | 0.0 | 0.0  | 0.0  | 0.0  |
| 1448811_at   | Mrpl2   | MitRibosomal protein | -1.3 | 0.0  | 0.0 | 0.0  | 0.0  | 0.0  |
| 1448849_at   | Mrpl40  | MitRibosomal protein | 0.0  | 0.0  | 0.0 | -1.3 | 0.0  | 0.0  |
| 1448869_a_at | Mrps16  | MitRibosomal protein | 0.0  | 0.0  | 0.0 | 0.0  | 1.3  | 0.0  |
| 1448909_a_at | Mrpl39  | MitRibosomal protein | 0.0  | 0.0  | 0.0 | 0.0  | 0.0  | 0.0  |
| 1448921_a_at | Mrps9   | MitRibosomal protein | 0.0  | 0.0  | 0.0 | -1.2 | 0.0  | 0.0  |
| 1449004_at   | Mrpl46  | MitRibosomal protein | 0.0  | 0.0  | 0.0 | 0.0  | 1.3  | 0.0  |
| 1449194_at   | Mrps25  | MitRibosomal protein | 0.0  | 0.0  | 0.0 | 0.0  | 0.0  | 0.0  |
| 1449294_at   | Mrps15  | MitRibosomal protein | 0.0  | 0.0  | 0.0 | 0.0  | 0.0  | -2.1 |
| 1450405_at   | Mrpl19  | MitRibosomal protein | 0.0  | 0.0  | 0.0 | 0.0  | 0.0  | 0.0  |
| 1450866_a_at | Mrpl17  | MitRibosomal protein | 0.0  | 0.0  | 0.0 | 0.0  | -1.2 | 0.0  |
| 1450867_at   | Mrpl17  | MitRibosomal protein | 0.0  | 0.0  | 0.0 | 0.0  | 0.0  | 0.0  |
| 1450880_at   | Mrpl16  | MitRibosomal protein | 0.0  | 0.0  | 0.0 | 0.0  | 0.0  | 0.0  |
| 1450948_a_at | Mrpl1   | MitRibosomal protein | 0.0  | 0.0  | 0.0 | 0.0  | 0.0  | 0.0  |
| 1451164_a_at | Mrps18b | MitRibosomal protein | -1.2 | 0.0  | 0.0 | 1.3  | 1.4  | 1.5  |
| 1451178_at   | Mrpl53  | MitRibosomal protein | 0.0  | 0.0  | 0.0 | 0.0  | 1.3  | 0.0  |



|                                |         |                      |      |     |     |     |      |      |
|--------------------------------|---------|----------------------|------|-----|-----|-----|------|------|
| 1451266_at                     | Mrpl50  | MitRibosomal protein | 0.0  | 0.0 | 0.0 | 0.0 | 0.0  | 0.0  |
| 1451307_at                     | Mrpl14  | MitRibosomal protein | 0.0  | 0.0 | 0.0 | 0.0 | 0.0  | 0.0  |
| 1452048_at                     | Mrpl12  | MitRibosomal protein | 0.0  | 0.0 | 0.0 | 1.4 | 2.0  | 2.0  |
| 1452144_a_at                   | Mrpl44  | MitRibosomal protein | 0.0  | 0.0 | 0.0 | 0.0 | 0.0  | 0.0  |
| 1452585_at                     | Mrps28  | MitRibosomal protein | -1.3 | 0.0 | 0.0 | 0.0 | 1.3  | 1.2  |
| 1453571_at                     | Mrpl19  | MitRibosomal protein | 0.0  | 0.0 | 0.0 | 0.0 | 0.0  | 0.0  |
| 1453725_a_at                   | Mrps7   | MitRibosomal protein | 0.0  | 0.0 | 0.0 | 0.0 | 0.0  | 0.0  |
| 1453728_a_at                   | Mrps17  | MitRibosomal protein | 0.0  | 0.0 | 0.0 | 0.0 | 0.0  | 0.0  |
| 1453954_a_at                   | Mrps5   | MitRibosomal protein | 0.0  | 0.0 | 0.0 | 0.0 | 0.0  | 0.0  |
| 1456109_a_at                   | Mrps15  | MitRibosomal protein | 0.0  | 0.0 | 0.0 | 0.0 | 0.0  | -1.6 |
| 1456313_x_at                   | Mrpl28  | MitRibosomal protein | 0.0  | 0.0 | 0.0 | 0.0 | 0.0  | 0.0  |
| 1460195_at                     | Mrps11  | MitRibosomal protein | 0.0  | 0.0 | 0.0 | 0.0 | 0.0  | 0.0  |
| 1460225_at                     | Mrp63   | MitRibosomal protein | 0.0  | 0.0 | 0.0 | 0.0 | 0.0  | 0.0  |
| 1460354_a_at                   | Mrpl13  | MitRibosomal protein | 0.0  | 0.0 | 0.0 | 0.0 | 0.0  | 0.0  |
| 1460701_a_at                   | Mrpl52  | MitRibosomal protein | 0.0  | 0.0 | 0.0 | 0.0 | -1.4 | -2.1 |
| 1416345_at                     | Timm8a  | TIMMS & TOMMS        | 0.0  | 0.0 | 0.0 | 1.9 | 1.9  | 2.1  |
| 1416346_at                     | Timm8a  | TIMMS & TOMMS        | 0.0  | 0.0 | 0.0 | 1.8 | 1.8  | 1.8  |
| 1416485_at                     | Timm23  | TIMMS & TOMMS        | 0.0  | 0.0 | 0.0 | 1.5 | 1.7  | 1.5  |
| 1417192_at                     | Tomm70a | TIMMS & TOMMS        | 0.0  | 0.0 | 0.0 | 1.6 | 1.5  | 1.7  |
| 1417499_at                     | Timm13a | TIMMS & TOMMS        | 0.0  | 0.0 | 1.3 | 1.4 | 1.4  | 1.3  |
| 1417670_at                     | Timm44  | TIMMS & TOMMS        | 0.0  | 0.0 | 0.0 | 0.0 | 1.4  | 1.7  |
| 1417916_a_at                   | Fxc1    | TIMMS & TOMMS        | 0.0  | 0.0 | 0.0 | 1.4 | 1.4  | 0.0  |
| 1423079_a_at                   | Tomm20  | TIMMS & TOMMS        | 0.0  | 0.0 | 0.0 | 0.0 | 0.0  | 0.0  |
| 1423080_at                     | Tomm20  | TIMMS & TOMMS        | 0.0  | 0.0 | 0.0 | 0.0 | 0.0  | 0.0  |
| 1423081_a_at                   | Tomm20  | TIMMS & TOMMS        | 0.0  | 0.0 | 0.0 | 1.2 | 0.0  | 0.0  |
| 1426118_a_at                   | Tomm40  | TIMMS & TOMMS        | 0.0  | 0.0 | 0.0 | 0.0 | 1.4  | 1.5  |
| 1426256_at                     | Timm17a | TIMMS & TOMMS        | 0.0  | 0.0 | 0.0 | 0.0 | 1.3  | 0.0  |
| 1426675_at                     | Tomm70a | TIMMS & TOMMS        | 0.0  | 0.0 | 0.0 | 1.5 | 1.6  | 1.6  |
| 1426676_s_at                   | Tomm70a | TIMMS & TOMMS        | 0.0  | 0.0 | 1.4 | 1.7 | 1.5  | 1.8  |
| 1428214_at                     | Tomm7   | TIMMS & TOMMS        | 0.0  | 0.0 | 0.0 | 0.0 | 0.0  | 0.0  |
| 1428215_x_at                   | Tomm7   | TIMMS & TOMMS        | 0.0  | 0.0 | 0.0 | 0.0 | 0.0  | 0.0  |
| 1428216_s_at                   | Tomm7   | TIMMS & TOMMS        | 0.0  | 0.0 | 0.0 | 0.0 | 0.0  | 0.0  |
| 1431665_a_at                   | Timm8b  | TIMMS & TOMMS        | 0.0  | 0.0 | 0.0 | 0.0 | 0.0  | 0.0  |
| 1434732_x_at                   | Tomm7   | TIMMS & TOMMS        | 0.0  | 0.0 | 0.0 | 0.0 | 0.0  | 0.0  |
| 1435534_a_at                   | Tomm20  | TIMMS & TOMMS        | 0.0  | 0.0 | 0.0 | 0.0 | 0.0  | 0.0  |
| 1438656_x_at                   | Timm17b | TIMMS & TOMMS        | 0.0  | 0.0 | 0.0 | 0.0 | 0.0  | 0.0  |
| 1439371_x_at                   | Timm44  | TIMMS & TOMMS        | 0.0  | 0.0 | 0.0 | 0.0 | 0.0  | 0.0  |
| 1448345_at                     | Tomm34  | TIMMS & TOMMS        | 0.0  | 0.0 | 0.0 | 0.0 | 0.0  | 0.0  |
| 1448517_at                     | Timm22  | TIMMS & TOMMS        | 0.0  | 0.0 | 0.0 | 0.0 | 1.5  | 0.0  |
| 1448801_a_at                   | Timm44  | TIMMS & TOMMS        | 0.0  | 0.0 | 0.0 | 0.0 | 0.0  | 1.3  |
| 1449886_a_at                   | Timm10  | TIMMS & TOMMS        | 0.0  | 0.0 | 0.0 | 1.5 | 1.7  | 0.0  |
| 1455211_a_at                   | Timm9   | TIMMS & TOMMS        | 0.0  | 0.0 | 0.0 | 0.0 | 1.5  | 1.5  |
| 1455357_x_at                   | Tomm20  | TIMMS & TOMMS        | 0.0  | 0.0 | 0.0 | 1.3 | 0.0  | 0.0  |
| 1455456_a_at                   | Timm50  | TIMMS & TOMMS        | 0.0  | 0.0 | 0.0 | 0.0 | 0.0  | 0.0  |
| 1460685_at                     | Timm17b | TIMMS & TOMMS        | 0.0  | 0.0 | 0.0 | 0.0 | 0.0  | 0.0  |
| <b>Probe sets in Figure 3B</b> |         |                      |      |     |     |     |      |      |
| 1429533_at                     | Immt    | Structure            | 0.0  | 0.0 | 0.0 | 0.0 | 1.7  | 2.3  |
| 1429534_a_at                   | Immt    | Structure            | 0.0  | 0.0 | 0.0 | 0.0 | 1.5  | 1.6  |

|                                            |          |                      |     |      |     |      |      |      |
|--------------------------------------------|----------|----------------------|-----|------|-----|------|------|------|
| 1433470_a_at                               | Immt     | Structure            | 0.0 | 0.0  | 0.0 | 0.0  | 1.5  | 1.5  |
| 1418768_at                                 | Opa1     | Structure            | 0.0 | 0.0  | 0.0 | 0.0  | 0.0  | 1.7  |
| 1449214_a_at                               | Opa1     | Structure            | 0.0 | 0.0  | 0.0 | 0.0  | 1.9  | 2.2  |
| 1451541_at                                 | Bcs1l    | Structure            | 0.0 | 0.0  | 0.0 | 0.0  | 0.0  | 0.0  |
| 1450561_a_at                               | Surf1    | Structure            | 0.0 | 0.0  | 0.0 | 0.0  | -1.5 | -1.7 |
| <b>Probe sets in Figure 3C</b>             |          |                      |     |      |     |      |      |      |
| 1460652_at                                 | Esrra    | Transcription Factor | 0.0 | 0.0  | 0.0 | 0.0  | 1.7  | 1.6  |
| 1450664_at                                 | Gabpa    | Transcription Factor | 0.0 | 0.0  | 0.0 | 0.0  | 0.0  | 0.0  |
| 1450665_at                                 | Gabpa    | Transcription Factor | 0.0 | 0.0  | 0.0 | 0.0  | 1.4  | 1.5  |
| 1436232_a_at                               | Gabpb1   | Transcription Factor | 0.0 | -1.4 | 0.0 | 0.0  | 0.0  | 0.0  |
| 1419761_a_at                               | Gabpb1   | Transcription Factor | 0.0 | 0.0  | 0.0 | 0.0  | 0.0  | 0.0  |
| 1450444_a_at                               | Nr1h3    | Transcription factor | 0.0 | 0.0  | 0.0 | 0.0  | 0.0  | 0.0  |
| 1424787_a_at                               | Nrf1     | Transcription Factor | 0.0 | 0.0  | 1.3 | 0.0  | 0.0  | 0.0  |
| 1434627_at                                 | Nrf1     | Transcription Factor | 0.0 | 0.0  | 0.0 | 0.0  | 0.0  | 0.0  |
| 1418469_at                                 | Nrip1    | Transcription Factor | 0.0 | 1.5  | 1.4 | 1.4  | 1.5  | 0.0  |
| 1449089_at                                 | Nrip1    | Transcription Factor | 0.0 | 1.4  | 1.4 | 1.5  | 1.3  | 0.0  |
| 1449051_at                                 | Ppara    | Transcription Factor | 0.0 | 0.0  | 0.0 | 0.0  | 5.9  | 6.4  |
| 1460336_at                                 | Ppargc1a | Transcription Factor | 0.0 | 0.0  | 0.0 | 0.0  | 2.2  | 0.0  |
| 1449945_at                                 | Ppargc1b | Transcription Factor | 0.0 | 1.9  | 1.8 | 1.7  | 2.1  | 2.0  |
| 1426381_at                                 | Pprc1    | Transcription Factor | 0.0 | 0.0  | 0.0 | 0.0  | 0.0  | 0.0  |
| 1448224_at                                 | Tfam     | Transcription Factor | 0.0 | 0.0  | 0.0 | 0.0  | -1.2 | 0.0  |
| 1449749_s_at                               | Tfb1m    | Transcription Factor | 0.0 | 0.0  | 0.0 | -1.3 | -1.4 | 0.0  |
| 1423441_at                                 | Tfb2m    | Transcription Factor | 0.0 | 0.0  | 0.0 | 0.0  | 0.0  | 0.0  |
| <b>Probe sets in Supplemental Figure 2</b> |          |                      |     |      |     |      |      |      |
| 1417867_at                                 | Adn      |                      | 0.0 | 0.0  | 0.0 | 0.0  | 0.0  | 0.0  |
| 1423828_at                                 | Fasn     |                      | 0.0 | 0.0  | 0.0 | 0.0  | 1.4  | 1.7  |
| 1434773_a_at                               | Slc2a1   |                      | 0.0 | 0.0  | 0.0 | 0.0  | 0.0  | 2.7  |
| 1426600_at                                 | Slc2a1   |                      | 0.0 | 0.0  | 0.0 | 0.0  | 1.5  | 2.4  |
| 1426599_a_at                               | Slc2a1   |                      | 0.0 | 0.0  | 0.0 | 0.0  | 0.0  | 2.5  |
| <b>Probe sets mentioned in Discussion</b>  |          |                      |     |      |     |      |      |      |
| 1422820_at                                 | Lipe     |                      | 0.0 | 0.0  | 1.4 | 0.0  | 1.3  | 1.3  |
| 1428143_a_at                               | Pnpla2   |                      | 0.0 | 0.0  | 0.0 | 1.4  | 1.7  | 1.6  |
| 1428591_at                                 | Pnpla2   |                      | 0.0 | 0.0  | 0.0 | 1.6  | 1.8  | 1.7  |
| 1427367_at                                 | Pnpla2   |                      | 0.0 | 0.0  | 0.0 | 0.0  | 0.0  | 0.0  |

## B. C3H/10T1/2 Adipocytes

| Probe set                     | Gene Symbol | Category | 1 hr | 2 hr | 4 hr | 7 hr | 24 hr | 48 hr |
|-------------------------------|-------------|----------|------|------|------|------|-------|-------|
| <b>Probe sets in Figure 2</b> |             |          |      |      |      |      |       |       |
| 1415687_a_at                  | Psap        | FAO      | 0.0  | 0.0  | 0.0  | 0.0  | 0.0   | 0.0   |
| 1415984_at                    | Acadm       | FAO      | 0.0  | 0.0  | 0.0  | 1.2  | 1.6   | 1.8   |
| 1416408_at                    | Acox1       | FAO      | 0.0  | 0.0  | 0.0  | 1.4  | 0.0   | 1.4   |
| 1416409_at                    | Acox1       | FAO      | 0.0  | 0.0  | 0.0  | 1.5  | 1.6   | 1.6   |
| 1416772_at                    | Cpt2        | FAO      | 0.0  | 0.0  | 0.0  | 0.0  | 1.3   | 1.4   |
| 1417008_at                    | Crat        | FAO      | 0.0  | 1.2  | 1.2  | 1.4  | 1.5   | 1.7   |
| 1417369_at                    | Hsd17b4     | FAO      | 0.0  | 0.0  | 1.3  | 1.3  | 1.5   | 1.3   |
| 1418321_at                    | Dci         | FAO      | 0.0  | 0.0  | 0.0  | 0.0  | 1.5   | 1.5   |

|              |          |     |     |     |     |      |      |      |
|--------------|----------|-----|-----|-----|-----|------|------|------|
| 1418328_at   | Cpt1b    | FAO | 0.0 | 0.0 | 0.0 | 0.0  | 4.8  | 6.0  |
| 1418862_at   | Echdc3   | FAO | 0.0 | 0.0 | 0.0 | 0.0  | 0.0  | 0.0  |
| 1419261_at   | Acad8    | FAO | 0.0 | 0.0 | 0.0 | 0.0  | 0.0  | 0.0  |
| 1419262_at   | Acad8    | FAO | 0.0 | 0.0 | 0.0 | 0.0  | 0.0  | 1.2  |
| 1419367_at   | Decr1    | FAO | 0.0 | 0.0 | 0.0 | 0.0  | 1.5  | 1.7  |
| 1420776_a_at | Auh      | FAO | 0.0 | 0.0 | 0.0 | 0.0  | 0.0  | 0.0  |
| 1422526_at   | Acs1     | FAO | 0.0 | 1.3 | 1.7 | 3.1  | 1.3  | 1.3  |
| 1423883_at   | Acs1     | FAO | 0.0 | 0.0 | 0.0 | 1.9  | 1.2  | 0.0  |
| 1424182_at   | Acat1    | FAO | 0.0 | 0.0 | 0.0 | 0.0  | 1.8  | 1.3  |
| 1424183_at   | Acat1    | FAO | 0.0 | 0.0 | 0.0 | 0.0  | 0.0  | 1.3  |
| 1424184_at   | Acadvl   | FAO | 0.0 | 0.0 | 0.0 | 0.0  | 1.6  | 1.8  |
| 1424451_at   | MGC29978 | FAO | 0.0 | 0.0 | 1.2 | 1.4  | 2.8  | 3.6  |
| 1425195_a_at | Acat2    | FAO | 0.0 | 0.0 | 0.0 | 0.0  | 1.4  | 0.0  |
| 1426522_at   | Hadhb    | FAO | 0.0 | 0.0 | 0.0 | 0.0  | 1.9  | 2.1  |
| 1428082_at   | Acs15    | FAO | 0.0 | 0.0 | 0.0 | 0.0  | -1.6 | -1.3 |
| 1428145_at   | Acaa2    | FAO | 0.0 | 0.0 | 0.0 | 0.0  | 1.9  | 3.1  |
| 1428146_s_at | Acaa2    | FAO | 0.0 | 0.0 | 0.0 | 0.0  | 1.9  | 2.5  |
| 1429339_a_at | Acad10   | FAO | 0.0 | 0.0 | 0.0 | 0.0  | 0.0  | 1.5  |
| 1429581_at   | Acad9    | FAO | 0.0 | 0.0 | 0.0 | 0.0  | 0.0  | 0.0  |
| 1435630_s_at | Acat2    | FAO | 0.0 | 0.0 | 0.0 | 0.0  | 1.3  | 0.0  |
| 1436756_x_at | Hadhsc   | FAO | 0.0 | 0.0 | 0.0 | 0.0  | 0.0  | 0.0  |
| 1437172_x_at | Hadhb    | FAO | 0.0 | 0.0 | 0.0 | 0.0  | 1.8  | 1.6  |
| 1438291_x_at | Acads    | FAO | 0.0 | 0.0 | 0.0 | 0.0  | 0.0  | 0.0  |
| 1438391_x_at | Hadh2    | FAO | 0.0 | 0.0 | 0.0 | 0.0  | 0.0  | 0.0  |
| 1448286_at   | Hadh2    | FAO | 0.0 | 0.0 | 0.0 | 0.0  | 0.0  | 0.0  |
| 1448382_at   | Ehhadh   | FAO | 0.0 | 2.6 | 2.3 | 2.8  | 2.7  | 2.4  |
| 1448491_at   | Ech1     | FAO | 0.0 | 0.0 | 0.0 | 0.0  | 1.2  | 1.4  |
| 1448544_at   | Crat     | FAO | 0.0 | 0.0 | 0.0 | 0.0  | 0.0  | 0.0  |
| 1448717_at   | Gcdh     | FAO | 0.0 | 0.0 | 0.0 | 0.0  | 0.0  | 0.0  |
| 1448987_at   | Acadl    | FAO | 0.0 | 0.0 | 0.0 | 1.3  | 1.5  | 1.3  |
| 1448988_at   | Acadl    | FAO | 0.0 | 0.0 | 0.0 | 0.0  | 0.0  | 0.0  |
| 1449443_at   | Decr1    | FAO | 0.0 | 0.0 | 0.0 | 1.3  | 1.5  | 1.4  |
| 1449964_a_at | Mlycd    | FAO | 0.0 | 0.0 | 0.0 | 1.5  | 1.7  | 1.4  |
| 1450643_s_at | Acs1     | FAO | 0.0 | 0.0 | 1.6 | 2.7  | 0.0  | 0.0  |
| 1451271_a_at | Acat1    | FAO | 0.0 | 0.0 | 0.0 | 0.0  | 0.0  | 1.4  |
| 1451511_at   | Hibch    | FAO | 0.0 | 0.0 | 0.0 | 0.0  | 0.0  | 0.0  |
| 1451512_s_at | Hibch    | FAO | 0.0 | 0.0 | 0.0 | 0.0  | 0.0  | 0.0  |
| 1452173_at   | Hadha    | FAO | 0.0 | 0.0 | 0.0 | 1.2  | 1.9  | 2.0  |
| 1452341_at   | Echs1    | FAO | 0.0 | 0.0 | 0.0 | 0.0  | 0.0  | 0.0  |
| 1453206_at   | Acad9    | FAO | 0.0 | 0.0 | 0.0 | 0.0  | 0.0  | 0.0  |
| 1455061_a_at | Acaa2    | FAO | 0.0 | 0.0 | 0.0 | 1.4  | 2.0  | 2.3  |
| 1455446_x_at | Acadsb   | FAO | 0.0 | 0.0 | 0.0 | -1.3 | -1.5 | -1.4 |
| 1455777_x_at | Hsd17b4  | FAO | 0.0 | 0.0 | 0.0 | 0.0  | 1.4  | 0.0  |
| 1455972_x_at | Hadhsc   | FAO | 0.0 | 0.0 | 0.0 | 0.0  | 1.3  | 0.0  |
| 1460184_at   | Hadhsc   | FAO | 0.0 | 0.0 | 0.0 | 0.0  | 1.3  | 1.3  |
| 1460216_at   | Acads    | FAO | 0.0 | 0.0 | 1.2 | 0.0  | 1.3  | 1.5  |
| 1460316_at   | Acs1     | FAO | 0.0 | 0.0 | 1.7 | 1.9  | 1.3  | 0.0  |
| 1460409_at   | Cpt1a    | FAO | 0.0 | 0.0 | 0.0 | 0.0  | 0.0  | 0.0  |

|              |               |            |     |     |     |     |      |     |
|--------------|---------------|------------|-----|-----|-----|-----|------|-----|
| 1423972_at   | EtfA          | OXPHOS/FAO | 0.0 | 0.0 | 0.0 | 0.0 | 0.0  | 1.3 |
| 1428181_at   | EtfB          | OXPHOS/FAO | 0.0 | 0.0 | 0.0 | 0.0 | 0.0  | 1.3 |
| 1451084_at   | EtfDh         | OXPHOS/FAO | 0.0 | 0.0 | 0.0 | 1.3 | 1.8  | 1.9 |
| 1429709_at   | Pmpcb         | OXPHOS     | 0.0 | 0.0 | 0.0 | 0.0 | 0.0  | 0.0 |
| 1433729_x_at | Pmpcb         | OXPHOS     | 0.0 | 0.0 | 0.0 | 0.0 | 0.0  | 0.0 |
| 1434053_x_at | Atp5k         | OXPHOS     | 0.0 | 0.0 | 0.0 | 0.0 | 1.6  | 1.4 |
| 1450640_x_at | Atp5k         | OXPHOS     | 0.0 | 0.0 | 0.0 | 0.0 | 1.5  | 1.4 |
| 1415980_at   | Atp5g2        | OXPHOS     | 0.0 | 0.0 | 0.0 | 0.0 | 0.0  | 0.0 |
| 1416058_s_at | Atp5c1        | OXPHOS     | 0.0 | 0.0 | 0.0 | 0.0 | 0.0  | 1.2 |
| 1416143_at   | Atp5j         | OXPHOS     | 0.0 | 0.0 | 0.0 | 0.0 | 1.3  | 0.0 |
| 1416269_at   | Atp5j2        | OXPHOS     | 0.0 | 0.0 | 0.0 | 1.2 | 1.6  | 0.0 |
| 1416278_a_at | Atp5o         | OXPHOS     | 0.0 | 0.0 | 0.0 | 0.0 | 1.7  | 1.3 |
| 1416567_s_at | Atp5e         | OXPHOS     | 0.0 | 0.0 | 0.0 | 0.0 | 1.4  | 0.0 |
| 1416829_at   | Atp5b         | OXPHOS     | 0.0 | 0.0 | 0.0 | 0.0 | 0.0  | 0.0 |
| 1417970_at   | Atp5s         | OXPHOS     | 0.0 | 0.0 | 0.0 | 0.0 | 0.0  | 0.0 |
| 1420037_at   | Atp5a1        | OXPHOS     | 0.0 | 0.0 | 0.0 | 0.0 | 0.0  | 0.0 |
| 1422508_at   | Atp6v1a1      | OXPHOS     | 0.0 | 0.0 | 0.0 | 0.0 | 0.0  | 0.0 |
| 1423111_at   | Atp5a1        | OXPHOS     | 0.0 | 0.0 | 0.0 | 0.0 | 1.3  | 1.4 |
| 1423676_at   | Atp5h         | OXPHOS     | 0.0 | 0.0 | 0.0 | 0.0 | 1.2  | 1.2 |
| 1423716_s_at | Atp5d         | OXPHOS     | 0.0 | 0.0 | 0.0 | 0.0 | 1.4  | 1.3 |
| 1426742_at   | Atp5f1        | OXPHOS     | 0.0 | 0.0 | 0.0 | 0.0 | 1.3  | 1.4 |
| 1433562_s_at | Atp5f1        | OXPHOS     | 0.0 | 0.0 | 0.0 | 0.0 | 1.4  | 0.0 |
| 1435112_a_at | Atp5h         | OXPHOS     | 0.0 | 0.0 | 0.0 | 0.0 | 0.0  | 1.5 |
| 1435395_s_at | Atp5j2        | OXPHOS     | 0.0 | 0.0 | 0.0 | 0.0 | 1.3  | 0.0 |
| 1437164_x_at | Atp5o         | OXPHOS     | 0.0 | 0.0 | 0.0 | 0.0 | 1.4  | 1.3 |
| 1438809_at   | Atp5c1        | OXPHOS     | 0.0 | 0.0 | 0.0 | 0.0 | 0.0  | 0.0 |
| 1448203_at   | Atp5l         | OXPHOS     | 0.0 | 0.0 | 0.0 | 0.0 | 1.4  | 0.0 |
| 1448211_at   | 0610006O14Rik | OXPHOS     | 0.0 | 0.0 | 0.0 | 0.0 | -1.5 | 0.0 |
| 1449710_s_at | Atp5a1        | OXPHOS     | 0.0 | 0.0 | 0.0 | 0.0 | 1.3  | 1.3 |
| 1449712_s_at | Atp6v1e1      | OXPHOS     | 0.0 | 0.0 | 0.0 | 1.2 | 0.0  | 0.0 |
| 1450634_at   | Atp6v1a1      | OXPHOS     | 0.0 | 0.0 | 0.0 | 0.0 | 0.0  | 0.0 |
| 1454661_at   | Atp5g3        | OXPHOS     | 0.0 | 0.0 | 0.0 | 0.0 | 0.0  | 0.0 |
| 1456580_s_at | Atp5d         | OXPHOS     | 0.0 | 0.0 | 0.0 | 0.0 | 1.3  | 1.3 |
| 1415966_a_at | Ndufv1        | OXPHOS     | 0.0 | 0.0 | 0.0 | 0.0 | 1.4  | 1.4 |
| 1415967_at   | Ndufv1        | OXPHOS     | 0.0 | 0.0 | 0.0 | 0.0 | 1.4  | 1.4 |
| 1416056_a_at | Np15          | OXPHOS     | 0.0 | 0.0 | 0.0 | 0.0 | 0.0  | 1.2 |
| 1416057_at   | Np15          | OXPHOS     | 0.0 | 0.0 | 0.0 | 0.0 | 1.3  | 1.2 |
| 1416285_at   | Ndufc1        | OXPHOS     | 0.0 | 0.0 | 0.0 | 0.0 | 1.4  | 1.4 |
| 1416366_at   | Ndufc2        | OXPHOS     | 0.0 | 0.0 | 0.0 | 1.3 | 1.5  | 1.4 |
| 1416417_a_at | Ndufb7        | OXPHOS     | 0.0 | 0.0 | 0.0 | 0.0 | 1.4  | 1.3 |
| 1416495_s_at | Ndufs5        | OXPHOS     | 0.0 | 0.0 | 0.0 | 0.0 | 1.4  | 0.0 |
| 1416547_at   | Ndufb3        | OXPHOS     | 0.0 | 0.0 | 1.2 | 1.4 | 1.6  | 1.4 |
| 1416663_at   | Ndufa9        | OXPHOS     | 0.0 | 0.0 | 0.0 | 0.0 | 1.4  | 1.4 |
| 1416834_x_at | Ndufb2        | OXPHOS     | 0.0 | 0.0 | 0.0 | 0.0 | 0.0  | 0.0 |
| 1417102_a_at | Ndufb5        | OXPHOS     | 0.0 | 0.0 | 0.0 | 0.0 | 1.6  | 0.0 |
| 1417285_a_at | Ndufa5        | OXPHOS     | 0.0 | 0.0 | 0.0 | 0.0 | 1.6  | 1.4 |
| 1417286_at   | Ndufa5        | OXPHOS     | 0.0 | 0.0 | 0.0 | 1.3 | 1.5  | 1.4 |
| 1417368_s_at | Ndufa2        | OXPHOS     | 0.0 | 0.0 | 0.0 | 0.0 | 1.3  | 0.0 |

|              |               |        |     |     |     |     |     |     |
|--------------|---------------|--------|-----|-----|-----|-----|-----|-----|
| 1418068_at   | Ndufa10       | OXPHOS | 0.0 | 0.0 | 0.0 | 0.0 | 2.1 | 0.0 |
| 1418117_at   | Ndufs4        | OXPHOS | 0.0 | 0.0 | 0.0 | 0.0 | 0.0 | 0.0 |
| 1418814_s_at | 2410011G03Rik | OXPHOS | 0.0 | 0.0 | 0.0 | 0.0 | 1.5 | 0.0 |
| 1422241_a_at | Ndufa1        | OXPHOS | 0.0 | 0.0 | 0.0 | 0.0 | 1.2 | 0.0 |
| 1422976_x_at | Ndufa7        | OXPHOS | 0.0 | 0.0 | 0.0 | 0.0 | 1.5 | 0.0 |
| 1423692_at   | Ndufa8        | OXPHOS | 0.0 | 0.0 | 0.0 | 1.3 | 1.4 | 1.5 |
| 1423737_at   | Ndufs3        | OXPHOS | 0.0 | 0.0 | 0.0 | 0.0 | 1.3 | 1.3 |
| 1423907_a_at | Ndufs8        | OXPHOS | 0.0 | 0.0 | 0.0 | 0.0 | 1.3 | 1.3 |
| 1424085_at   | Ndufa4        | OXPHOS | 0.0 | 0.0 | 0.0 | 0.0 | 1.4 | 1.3 |
| 1424313_a_at | Ndufs7        | OXPHOS | 0.0 | 0.0 | 0.0 | 0.0 | 1.4 | 1.5 |
| 1424628_a_at | 1500032D16Rik | OXPHOS | 0.0 | 0.0 | 0.0 | 0.0 | 0.0 | 1.3 |
| 1425143_a_at | Ndufs1        | OXPHOS | 0.0 | 0.0 | 0.0 | 0.0 | 1.4 | 1.7 |
| 1428075_at   | Ndufb4        | OXPHOS | 0.0 | 0.0 | 0.0 | 0.0 | 1.3 | 0.0 |
| 1428076_s_at | Ndufb4        | OXPHOS | 0.0 | 0.0 | 0.0 | 0.0 | 1.3 | 0.0 |
| 1428159_s_at | Ndufab1       | OXPHOS | 0.0 | 0.0 | 0.0 | 0.0 | 1.4 | 1.3 |
| 1428160_at   | Ndufab1       | OXPHOS | 0.0 | 0.0 | 0.0 | 0.0 | 0.0 | 0.0 |
| 1428179_at   | Ndufv2        | OXPHOS | 0.0 | 0.0 | 0.0 | 1.2 | 1.3 | 0.0 |
| 1428322_a_at | Ndufb10       | OXPHOS | 0.0 | 0.0 | 0.0 | 1.4 | 1.6 | 1.6 |
| 1428360_x_at | Ndufa7        | OXPHOS | 0.0 | 0.0 | 0.0 | 0.0 | 1.2 | 1.3 |
| 1428464_at   | Ndufa3        | OXPHOS | 0.0 | 0.0 | 0.0 | 0.0 | 1.3 | 1.3 |
| 1429708_at   | Ndufa11       | OXPHOS | 0.0 | 0.0 | 0.0 | 0.0 | 1.4 | 0.0 |
| 1430713_s_at | Grim19        | OXPHOS | 0.0 | 0.0 | 0.0 | 0.0 | 1.3 | 1.3 |
| 1433513_x_at | 2410011G03Rik | OXPHOS | 0.0 | 0.0 | 0.0 | 0.0 | 0.0 | 0.0 |
| 1434212_at   | Ndufs8        | OXPHOS | 0.0 | 0.0 | 0.0 | 0.0 | 0.0 | 0.0 |
| 1434213_x_at | Ndufs8        | OXPHOS | 0.0 | 0.0 | 0.0 | 0.0 | 1.5 | 1.3 |
| 1434579_x_at | Ndufs8        | OXPHOS | 0.0 | 0.0 | 1.3 | 0.0 | 1.3 | 1.5 |
| 1434856_at   | Ndufs1        | OXPHOS | 0.0 | 0.0 | 0.0 | 1.7 | 1.9 | 1.6 |
| 1435934_at   | Ndufab1       | OXPHOS | 0.0 | 0.0 | 0.0 | 0.0 | 0.0 | 0.0 |
| 1436567_a_at | Ndufa7        | OXPHOS | 0.0 | 0.0 | 0.0 | 0.0 | 0.0 | 0.0 |
| 1436803_a_at | Ndufb9        | OXPHOS | 0.0 | 0.0 | 0.0 | 0.0 | 1.3 | 0.0 |
| 1438159_x_at | Ndufv2        | OXPHOS | 0.0 | 0.0 | 0.0 | 1.4 | 1.6 | 1.4 |
| 1447919_x_at | Ndufab1       | OXPHOS | 0.0 | 0.0 | 0.0 | 0.0 | 1.4 | 0.0 |
| 1448198_a_at | Ndufb8        | OXPHOS | 0.0 | 0.0 | 0.0 | 0.0 | 1.5 | 1.3 |
| 1448284_a_at | Ndufc1        | OXPHOS | 0.0 | 0.0 | 0.0 | 0.0 | 1.6 | 1.4 |
| 1448331_at   | Ndufb7        | OXPHOS | 0.0 | 0.0 | 0.0 | 0.0 | 0.0 | 1.4 |
| 1448427_at   | Ndufa6        | OXPHOS | 0.0 | 0.0 | 0.0 | 0.0 | 1.3 | 1.3 |
| 1448483_a_at | Ndufb2        | OXPHOS | 0.0 | 0.0 | 0.0 | 0.0 | 0.0 | 0.0 |
| 1448589_at   | Ndufb5        | OXPHOS | 0.0 | 0.0 | 0.0 | 0.0 | 1.6 | 1.4 |
| 1448934_at   | Ndufa10       | OXPHOS | 0.0 | 0.0 | 0.0 | 0.0 | 1.5 | 1.4 |
| 1448959_at   | Ndufs4        | OXPHOS | 0.0 | 0.0 | 0.0 | 0.0 | 0.0 | 1.2 |
| 1450818_a_at | Ndufa7        | OXPHOS | 0.0 | 0.0 | 0.0 | 0.0 | 0.0 | 0.0 |
| 1451096_at   | Ndufs2        | OXPHOS | 0.0 | 0.0 | 0.0 | 0.0 | 1.4 | 1.5 |
| 1451312_at   | Ndufs7        | OXPHOS | 0.0 | 0.0 | 0.0 | 0.0 | 1.3 | 1.4 |
| 1452184_at   | Ndufb9        | OXPHOS | 0.0 | 0.0 | 0.0 | 0.0 | 1.2 | 1.2 |
| 1452692_a_at | Ndufv2        | OXPHOS | 0.0 | 0.0 | 0.0 | 0.0 | 1.3 | 1.3 |
| 1452790_x_at | Ndufa3        | OXPHOS | 0.0 | 0.0 | 0.0 | 0.0 | 1.4 | 1.4 |
| 1455036_s_at | Ndufc2        | OXPHOS | 0.0 | 0.0 | 0.0 | 0.0 | 0.0 | 1.2 |
| 1455283_x_at | Ndufs8        | OXPHOS | 0.0 | 0.0 | 0.0 | 0.0 | 1.3 | 1.4 |

|              |               |            |     |     |     |     |     |     |
|--------------|---------------|------------|-----|-----|-----|-----|-----|-----|
| 1455749_x_at | Ndufa7        | OXPHOS     | 0.0 | 0.0 | 0.0 | 1.5 | 1.5 | 1.2 |
| 1455806_x_at | 2410011G03Rik | OXPHOS     | 0.0 | 0.0 | 0.0 | 0.0 | 0.0 | 0.0 |
| 1455911_x_at | Np15          | OXPHOS     | 0.0 | 0.0 | 0.0 | 0.0 | 1.2 | 0.0 |
| 1456015_x_at | Ndufv1        | OXPHOS     | 0.0 | 0.0 | 0.0 | 0.0 | 0.0 | 1.5 |
| 1415933_a_at | Cox5a         | OXPHOS     | 0.0 | 0.0 | 0.0 | 0.0 | 1.5 | 1.3 |
| 1415970_at   | Cox6c         | OXPHOS     | 0.0 | 0.0 | 0.0 | 0.0 | 0.0 | 0.0 |
| 1416112_at   | Cox8a         | OXPHOS     | 0.0 | 0.0 | 0.0 | 0.0 | 0.0 | 0.0 |
| 1416565_at   | Cox6b1        | OXPHOS     | 0.0 | 0.0 | 0.0 | 0.0 | 1.3 | 0.0 |
| 1416604_at   | Cyc1          | OXPHOS     | 0.0 | 0.0 | 0.0 | 1.2 | 1.7 | 1.5 |
| 1416902_a_at | Cox5b         | OXPHOS     | 0.0 | 0.0 | 0.0 | 0.0 | 1.3 | 1.3 |
| 1416970_a_at | Cox7a2        | OXPHOS     | 0.0 | 0.0 | 0.0 | 0.0 | 0.0 | 0.0 |
| 1416971_at   | Cox7a2        | OXPHOS     | 0.0 | 0.0 | 0.0 | 0.0 | 0.0 | 1.3 |
| 1417417_a_at | Cox6a1        | OXPHOS     | 0.0 | 0.0 | 0.0 | 0.0 | 0.0 | 0.0 |
| 1417418_s_at | Cox6a1        | OXPHOS     | 0.0 | 0.0 | 0.0 | 0.0 | 0.0 | 1.3 |
| 1418709_at   | Cox7a1        | OXPHOS     | 0.0 | 0.0 | 0.0 | 0.0 | 2.1 | 4.6 |
| 1426693_x_at | Cox15         | OXPHOS     | 0.0 | 0.0 | 0.0 | 0.0 | 0.0 | 1.3 |
| 1432264_x_at | Cox7a2l       | OXPHOS     | 0.0 | 0.0 | 0.0 | 1.2 | 1.4 | 1.6 |
| 1434491_a_at | Cox6c         | OXPHOS     | 0.0 | 0.0 | 0.0 | 0.0 | 0.0 | 0.0 |
| 1435613_x_at | Cox5b         | OXPHOS     | 0.0 | 0.0 | 0.0 | 0.0 | 0.0 | 0.0 |
| 1436149_at   | Cox5b         | OXPHOS     | 0.0 | 0.0 | 0.0 | 0.0 | 1.4 | 0.0 |
| 1436409_at   | Cox8a         | OXPHOS     | 0.0 | 0.0 | 0.0 | 0.0 | 0.0 | 0.0 |
| 1436757_a_at | Cox6b1        | OXPHOS     | 0.0 | 0.0 | 0.0 | 0.0 | 0.0 | 0.0 |
| 1437982_x_at | Cox15         | OXPHOS     | 0.0 | 0.0 | 0.0 | 0.0 | 0.0 | 0.0 |
| 1439267_x_at | Cox5a         | OXPHOS     | 0.0 | 0.0 | 0.0 | 0.0 | 0.0 | 2.0 |
| 1448112_at   | Cox7c         | OXPHOS     | 0.0 | 0.0 | 0.0 | 0.0 | 0.0 | 1.4 |
| 1448153_at   | Cox5a         | OXPHOS     | 0.0 | 0.0 | 0.0 | 1.3 | 1.8 | 0.0 |
| 1448222_x_at | Cox8a         | OXPHOS     | 0.0 | 0.0 | 0.0 | 0.0 | 0.0 | 0.0 |
| 1448322_a_at | Cox4i1        | OXPHOS     | 0.0 | 0.0 | 0.0 | 0.0 | 0.0 | 0.0 |
| 1449218_at   | Cox8b         | OXPHOS     | 0.0 | 0.0 | 0.0 | 0.0 | 1.4 | 1.5 |
| 1452146_a_at | Cox15         | OXPHOS     | 0.0 | 0.0 | 0.0 | 0.0 | 0.0 | 1.3 |
| 1454716_x_at | Cox5b         | OXPHOS     | 0.0 | 0.0 | 0.0 | 0.0 | 1.3 | 1.4 |
| 1455167_at   | Cox8c         | OXPHOS     | 0.0 | 0.0 | 0.0 | 0.0 | 0.0 | 0.0 |
| 1456588_x_at | Cox5b         | OXPHOS     | 0.0 | 0.0 | 0.0 | 0.0 | 1.3 | 0.0 |
| 1416337_at   | Uqcrb         | OXPHOS     | 0.0 | 0.0 | 0.0 | 0.0 | 1.6 | 1.4 |
| 1424364_a_at | 1110020P15Rik | OXPHOS     | 0.0 | 0.0 | 0.0 | 0.0 | 1.5 | 1.4 |
| 1427880_at   | 1500040F11Rik | OXPHOS     | 0.0 | 0.0 | 0.0 | 0.0 | 0.0 | 0.0 |
| 1428631_a_at | Uqcrc2        | OXPHOS     | 0.0 | 0.0 | 0.0 | 0.0 | 1.5 | 1.3 |
| 1428782_a_at | Uqcrc1        | OXPHOS     | 0.0 | 0.0 | 0.0 | 0.0 | 1.2 | 1.4 |
| 1430326_s_at | 1500040F11Rik | OXPHOS     | 0.0 | 0.0 | 0.0 | 0.0 | 1.5 | 1.5 |
| 1435757_a_at | Uqcrc2        | OXPHOS     | 0.0 | 0.0 | 0.0 | 0.0 | 1.4 | 0.0 |
| 1448292_at   | Uqcr          | OXPHOS     | 0.0 | 0.0 | 0.0 | 0.0 | 1.3 | 1.3 |
| 1450968_at   | Uqcfs1        | OXPHOS     | 0.0 | 0.0 | 0.0 | 1.2 | 1.5 | 1.4 |
| 1452133_at   | Uqcrh         | OXPHOS     | 0.0 | 0.0 | 0.0 | 0.0 | 1.4 | 1.3 |
| 1452613_at   | 1500040F11Rik | OXPHOS     | 0.0 | 0.0 | 0.0 | 0.0 | 0.0 | 0.0 |
| 1455997_a_at | Uqcrb         | OXPHOS     | 0.0 | 0.0 | 0.0 | 0.0 | 0.0 | 0.0 |
| 1422483_a_at | Cycs          | OXPHOS     | 0.0 | 0.0 | 0.0 | 1.3 | 1.8 | 1.5 |
| 1422484_at   | Cycs          | OXPHOS     | 0.0 | 0.0 | 0.0 | 1.3 | 1.9 | 1.8 |
| 1418005_at   | Sdhb          | OXPHOS/TCA | 0.0 | 0.0 | 0.0 | 0.0 | 1.4 | 1.6 |

|              |               |            |     |     |     |     |      |     |
|--------------|---------------|------------|-----|-----|-----|-----|------|-----|
| 1426688_at   | Sdha          | OXPHOS/TCA | 0.0 | 0.0 | 0.0 | 0.0 | 0.0  | 1.3 |
| 1426689_s_at | Sdha          | OXPHOS/TCA | 0.0 | 0.0 | 0.0 | 0.0 | 0.0  | 1.3 |
| 1428235_at   | Sdhd          | OXPHOS/TCA | 0.0 | 0.0 | 0.0 | 1.3 | 1.4  | 1.3 |
| 1435986_x_at | Sdhc          | OXPHOS/TCA | 0.0 | 0.0 | 0.0 | 0.0 | 2.2  | 0.0 |
| 1437489_x_at | Sdhd          | OXPHOS/TCA | 0.0 | 0.0 | 0.0 | 0.0 | 0.0  | 1.4 |
| 1448630_a_at | Sdhc          | OXPHOS/TCA | 0.0 | 0.0 | 0.0 | 0.0 | 1.3  | 1.3 |
| 1415891_at   | Suclg1        | TCA        | 0.0 | 0.0 | 0.0 | 0.0 | 1.4  | 1.3 |
| 1416090_at   | Pdhb          | TCA        | 0.0 | 0.0 | 0.0 | 0.0 | 1.3  | 0.0 |
| 1416383_a_at | Pcx           | TCA        | 0.0 | 0.0 | 0.0 | 1.3 | 1.2  | 0.0 |
| 1416478_a_at | Mdh2          | TCA        | 0.0 | 0.0 | 0.0 | 0.0 | 1.3  | 1.4 |
| 1416788_a_at | Idh3g         | TCA        | 0.0 | 0.0 | 0.0 | 0.0 | 1.4  | 1.4 |
| 1416789_at   | Idh3g         | TCA        | 0.0 | 0.0 | 1.2 | 0.0 | 1.3  | 1.4 |
| 1417273_at   | Pdk4          | TCA        | 2.2 | 2.9 | 2.3 | 3.6 | 4.0  | 4.6 |
| 1418560_at   | Pdha1         | TCA        | 0.0 | 0.0 | 0.0 | 0.0 | 0.0  | 0.0 |
| 1418885_a_at | Idh3b         | TCA        | 0.0 | 0.0 | 0.0 | 0.0 | 1.5  | 1.5 |
| 1418886_s_at | Idh3b         | TCA        | 0.0 | 0.0 | 0.0 | 0.0 | 1.5  | 1.5 |
| 1422500_at   | Idh3a         | TCA        | 0.0 | 0.0 | 0.0 | 1.7 | 1.8  | 1.7 |
| 1422501_s_at | Idh3a         | TCA        | 0.0 | 0.0 | 0.0 | 1.5 | 1.8  | 1.8 |
| 1422577_at   | Cs            | TCA        | 0.0 | 0.0 | 0.0 | 1.3 | 1.8  | 1.6 |
| 1422578_at   | Cs            | TCA        | 0.0 | 0.0 | 0.0 | 0.0 | 1.3  | 0.0 |
| 1423159_at   | Dld           | TCA        | 0.0 | 0.0 | 0.0 | 0.0 | 1.4  | 1.4 |
| 1423710_at   | Dlst          | TCA        | 0.0 | 0.0 | 0.0 | 0.0 | 1.4  | 1.5 |
| 1423747_a_at | Pdk1          | TCA        | 0.0 | 0.0 | 0.0 | 0.0 | 1.9  | 1.5 |
| 1423748_at   | Pdk1          | TCA        | 0.0 | 0.0 | 0.0 | 0.0 | 2.3  | 1.8 |
| 1424828_a_at | Fh1           | TCA        | 0.0 | 0.0 | 0.0 | 0.0 | 1.4  | 1.3 |
| 1425615_a_at | 1810010O14Rik | TCA        | 0.0 | 0.0 | 0.0 | 0.0 | 0.0  | 0.0 |
| 1426264_at   | Dlat          | TCA        | 0.0 | 0.0 | 0.0 | 1.8 | 1.9  | 2.0 |
| 1426265_x_at | Dlat          | TCA        | 0.0 | 0.0 | 0.0 | 1.6 | 2.1  | 2.1 |
| 1426410_at   | Pdk3          | TCA        | 0.0 | 0.0 | 0.0 | 0.0 | 0.0  | 0.0 |
| 1427441_a_at | Suclg2        | TCA        | 0.0 | 0.0 | 0.0 | 0.0 | -1.2 | 0.0 |
| 1431011_at   | Dlst          | TCA        | 0.0 | 0.0 | 0.0 | 2.3 | 0.0  | 0.0 |
| 1432016_a_at | Idh3a         | TCA        | 0.0 | 0.0 | 0.0 | 1.5 | 1.5  | 1.6 |
| 1433984_a_at | Mdh2          | TCA        | 0.0 | 0.0 | 0.0 | 0.0 | 1.3  | 0.0 |
| 1436934_s_at | Aco2          | TCA        | 0.0 | 0.0 | 0.0 | 0.0 | 1.8  | 1.8 |
| 1448214_at   | Pdhb          | TCA        | 1.5 | 0.0 | 0.0 | 0.0 | 1.4  | 1.4 |
| 1448825_at   | Pdk2          | TCA        | 0.0 | 0.0 | 0.0 | 0.0 | 2.4  | 3.2 |
| 1449137_at   | Pdha1         | TCA        | 0.0 | 0.0 | 0.0 | 0.0 | 1.3  | 1.5 |
| 1450048_a_at | Idh2          | TCA        | 0.0 | 0.0 | 0.0 | 0.0 | 0.0  | 0.0 |
| 1450667_a_at | Cs            | TCA        | 0.0 | 0.0 | 0.0 | 0.0 | 1.5  | 1.5 |
| 1451002_at   | Aco2          | TCA        | 0.0 | 0.0 | 0.0 | 0.0 | 1.5  | 1.6 |
| 1451274_at   | Ogdh          | TCA        | 0.0 | 0.0 | 0.0 | 0.0 | 1.7  | 1.8 |
| 1452005_at   | Dlat          | TCA        | 0.0 | 0.0 | 1.4 | 1.7 | 1.6  | 1.7 |
| 1452206_at   | Sucla2        | TCA        | 0.0 | 0.0 | 0.0 | 0.0 | 1.6  | 1.3 |
| 1417956_at   | Cidea         | UCP        | 0.0 | 0.0 | 0.0 | 0.0 | 0.0  | 3.7 |
| 1418197_at   | Ucp1          | UCP        | 0.0 | 0.0 | 0.0 | 0.0 | 0.0  | 0.0 |
| 1420657_at   | Ucp3          | UCP        | 0.0 | 0.0 | 0.0 | 0.0 | 1.4  | 1.5 |
| 1420658_at   | Ucp3          | UCP        | 0.0 | 0.0 | 1.9 | 2.0 | 1.6  | 1.7 |
| 1448188_at   | Ucp2          | UCP        | 0.0 | 0.0 | 1.3 | 0.0 | 1.5  | 1.5 |

|                                |          |                      |     |     |     |      |      |     |
|--------------------------------|----------|----------------------|-----|-----|-----|------|------|-----|
| 1416300_a_at                   | Slc25a3  | ATP_Shuttle          | 0.0 | 0.0 | 0.0 | 0.0  | 0.0  | 0.0 |
| 1417434_at                     | Gpd2     | ATP_Shuttle          | 0.0 | 0.0 | 0.0 | 0.0  | 0.0  | 0.0 |
| 1423108_at                     | Slc25a20 | ATP_Shuttle          | 0.0 | 0.0 | 0.0 | 1.5  | 2.1  | 1.9 |
| 1423109_s_at                   | Slc25a20 | ATP_Shuttle          | 0.0 | 0.0 | 0.0 | 1.6  | 2.4  | 1.7 |
| 1423772_x_at                   | Slc25a5  | ATP_Shuttle          | 0.0 | 0.0 | 0.0 | 0.0  | 0.0  | 0.0 |
| 1424735_at                     | Slc25a25 | ATP_Shuttle          | 0.0 | 0.0 | 0.0 | 0.0  | 0.0  | 0.0 |
| 1427483_at                     | Slc25a24 | ATP_Shuttle          | 0.0 | 0.0 | 0.0 | -2.0 | -2.6 | 0.0 |
| 1428929_s_at                   | Slc25a26 | ATP_Shuttle          | 0.0 | 0.0 | 0.0 | 0.0  | 0.0  | 1.5 |
| 1430542_a_at                   | Slc25a5  | ATP_Shuttle          | 0.0 | 0.0 | 0.0 | 0.0  | 0.0  | 0.0 |
| 1434801_x_at                   | Slc25a5  | ATP_Shuttle          | 0.0 | 0.0 | 0.0 | 1.4  | 0.0  | 0.0 |
| 1436874_x_at                   | Slc25a5  | ATP_Shuttle          | 0.0 | 0.0 | 0.0 | 0.0  | 1.3  | 0.0 |
| 1438360_x_at                   | Slc25a5  | ATP_Shuttle          | 0.0 | 0.0 | 0.0 | 0.0  | 0.0  | 0.0 |
| 1438546_x_at                   | Slc25a5  | ATP_Shuttle          | 0.0 | 0.0 | 0.0 | 1.3  | 1.2  | 0.0 |
| 1438922_x_at                   | Slc25a5  | ATP_Shuttle          | 0.0 | 0.0 | 0.0 | 0.0  | 1.7  | 0.0 |
| 1415990_at                     | Vdac2    | VDAC                 | 0.0 | 0.0 | 0.0 | 0.0  | 1.2  | 1.3 |
| 1415998_at                     | Vdac1    | VDAC                 | 0.0 | 0.0 | 0.0 | 0.0  | 1.5  | 1.3 |
| 1416175_a_at                   | Vdac3    | VDAC                 | 0.0 | 0.0 | 0.0 | 0.0  | 0.0  | 0.0 |
| 1436992_x_at                   | Vdac1    | VDAC                 | 0.0 | 0.0 | 0.0 | 0.0  | 1.2  | 1.3 |
| 1437192_x_at                   | Vdac1    | VDAC                 | 0.0 | 0.0 | 0.0 | 0.0  | 0.0  | 0.0 |
| 1437947_x_at                   | Vdac1    | VDAC                 | 0.0 | 0.0 | 0.0 | 0.0  | 2.0  | 0.0 |
| <b>Probe sets in Figure 3A</b> |          |                      |     |     |     |      |      |     |
| 1417066_at                     | Cabc1    | MitHSP               | 0.0 | 0.0 | 0.0 | -1.3 | 0.0  | 0.0 |
| 1417101_at                     | Hspa2    | MitHSP               | 0.0 | 0.0 | 0.0 | 0.0  | -1.6 | 0.0 |
| 1417320_at                     | Grpel1   | MitHSP               | 0.0 | 0.0 | 0.0 | 1.3  | 1.6  | 1.4 |
| 1418503_at                     | Hspa9a   | MitHSP               | 0.0 | 0.0 | 0.0 | 0.0  | 0.0  | 1.5 |
| 1418504_at                     | Hspa9a   | MitHSP               | 0.0 | 0.0 | 0.0 | 0.0  | 1.3  | 0.0 |
| 1420629_a_at                   | Dnaja3   | MitHSP               | 0.0 | 0.0 | 0.0 | 0.0  | 0.0  | 1.7 |
| 1422579_at                     | Hspe1    | MitHSP               | 0.0 | 0.0 | 0.0 | 1.3  | 1.2  | 1.3 |
| 1426351_at                     | Hspd1    | MitHSP               | 0.0 | 0.0 | 0.0 | 0.0  | 0.0  | 1.3 |
| 1431274_a_at                   | Hspa9a   | MitHSP               | 0.0 | 0.0 | 0.0 | 0.0  | 0.0  | 0.0 |
| 1449935_a_at                   | Dnaja3   | MitHSP               | 0.0 | 0.0 | 0.0 | 1.3  | 1.3  | 1.6 |
| 1450668_s_at                   | Hspe1    | MitHSP               | 0.0 | 0.0 | 0.0 | 0.0  | 0.0  | 0.0 |
| 1452262_at                     | Grpel2   | MitHSP               | 0.0 | 0.0 | 0.0 | 0.0  | 0.0  | 0.0 |
| 1415681_at                     | Mrpl43   | MitRibosomal protein | 0.0 | 0.0 | 0.0 | 0.0  | 0.0  | 0.0 |
| 1415690_at                     | Mrpl27   | MitRibosomal protein | 0.0 | 0.0 | 0.0 | 0.0  | 0.0  | 0.0 |
| 1415762_x_at                   | Mrpl52   | MitRibosomal protein | 0.0 | 0.0 | 0.0 | 0.0  | 0.0  | 0.0 |
| 1416284_at                     | Mrpl28   | MitRibosomal protein | 0.0 | 0.0 | 0.0 | 0.0  | 0.0  | 0.0 |
| 1416349_at                     | Mrpl34   | MitRibosomal protein | 0.0 | 0.0 | 0.0 | 1.3  | 1.3  | 1.6 |
| 1416510_at                     | Mrpl4    | MitRibosomal protein | 0.0 | 0.0 | 0.0 | 0.0  | 0.0  | 1.2 |
| 1416595_at                     | Mrps22   | MitRibosomal protein | 0.0 | 0.0 | 0.0 | 0.0  | 0.0  | 0.0 |
| 1416877_a_at                   | Mrpl51   | MitRibosomal protein | 0.0 | 0.0 | 0.0 | 0.0  | 1.7  | 1.2 |
| 1416879_at                     | Mrpl51   | MitRibosomal protein | 0.0 | 0.0 | 0.0 | 1.6  | 0.0  | 0.0 |
| 1416984_at                     | Mrps18a  | MitRibosomal protein | 0.0 | 0.0 | 0.0 | 0.0  | 0.0  | 0.0 |
| 1417966_at                     | Mrpl39   | MitRibosomal protein | 0.0 | 0.0 | 0.0 | 0.0  | 0.0  | 0.0 |
| 1418112_at                     | Mrpl10   | MitRibosomal protein | 0.0 | 0.0 | 0.0 | 0.0  | 0.0  | 0.0 |
| 1418137_at                     | Mrp63    | MitRibosomal protein | 0.0 | 0.0 | 0.0 | 0.0  | 0.0  | 0.0 |
| 1418716_at                     | Mrps25   | MitRibosomal protein | 0.0 | 0.0 | 0.0 | 0.0  | 0.0  | 0.0 |
| 1419362_at                     | Mrpl35   | MitRibosomal protein | 0.0 | 0.0 | 0.0 | 0.0  | 0.0  | 0.0 |



|              |         |                      |     |     |     |     |     |     |
|--------------|---------|----------------------|-----|-----|-----|-----|-----|-----|
| 1419363_a_at | Mrpl35  | MitRibosomal protein | 0.0 | 0.0 | 0.0 | 0.0 | 0.0 | 0.0 |
| 1420488_at   | Mrps14  | MitRibosomal protein | 0.0 | 0.0 | 0.0 | 0.0 | 0.0 | 0.0 |
| 1420489_at   | Mrps14  | MitRibosomal protein | 0.0 | 0.0 | 0.0 | 0.0 | 0.0 | 0.0 |
| 1420845_at   | Mrps2   | MitRibosomal protein | 0.0 | 0.0 | 0.0 | 0.0 | 0.0 | 1.6 |
| 1420846_at   | Mrps2   | MitRibosomal protein | 0.0 | 0.0 | 0.0 | 0.0 | 1.2 | 1.4 |
| 1421874_a_at | Mrps23  | MitRibosomal protein | 0.0 | 0.0 | 0.0 | 1.3 | 1.4 | 1.3 |
| 1421875_a_at | Mrps23  | MitRibosomal protein | 0.0 | 0.0 | 0.0 | 0.0 | 0.0 | 1.4 |
| 1421914_s_at | Mrpl19  | MitRibosomal protein | 0.0 | 0.0 | 0.0 | 0.0 | 0.0 | 1.4 |
| 1421971_a_at | Mrps34  | MitRibosomal protein | 0.0 | 0.0 | 1.2 | 1.2 | 0.0 | 1.2 |
| 1422451_at   | Mrps21  | MitRibosomal protein | 0.0 | 0.0 | 0.0 | 0.0 | 1.3 | 0.0 |
| 1422819_at   | Mrpl36  | MitRibosomal protein | 0.0 | 0.0 | 0.0 | 0.0 | 0.0 | 0.0 |
| 1423219_a_at | Mrpl49  | MitRibosomal protein | 0.0 | 0.0 | 0.0 | 0.0 | 0.0 | 0.0 |
| 1423242_at   | Mrps36  | MitRibosomal protein | 0.0 | 0.0 | 0.0 | 0.0 | 1.3 | 0.0 |
| 1423492_at   | Mrpl45  | MitRibosomal protein | 0.0 | 0.0 | 0.0 | 0.0 | 1.6 | 1.3 |
| 1423764_s_at | Mrpl37  | MitRibosomal protein | 0.0 | 0.0 | 0.0 | 0.0 | 0.0 | 1.2 |
| 1423857_at   | Mrpl30  | MitRibosomal protein | 0.0 | 0.0 | 0.0 | 0.0 | 1.2 | 1.3 |
| 1424164_at   | Mrpl50  | MitRibosomal protein | 0.0 | 0.0 | 0.0 | 0.0 | 0.0 | 0.0 |
| 1424204_at   | Mrpl13  | MitRibosomal protein | 0.0 | 0.0 | 0.0 | 0.0 | 0.0 | 0.0 |
| 1424372_at   | Mrpl32  | MitRibosomal protein | 0.0 | 0.0 | 0.0 | 0.0 | 0.0 | 0.0 |
| 1424440_at   | Mrps6   | MitRibosomal protein | 0.0 | 0.0 | 1.2 | 1.2 | 0.0 | 0.0 |
| 1425189_a_at | Mrpl15  | MitRibosomal protein | 0.0 | 0.0 | 0.0 | 1.3 | 1.5 | 1.3 |
| 1426651_at   | Mrpl44  | MitRibosomal protein | 0.0 | 0.0 | 0.0 | 0.0 | 0.0 | 0.0 |
| 1427158_at   | Mrps30  | MitRibosomal protein | 0.0 | 0.0 | 0.0 | 0.0 | 0.0 | 0.0 |
| 1427173_a_at | Mrps33  | MitRibosomal protein | 0.0 | 0.0 | 0.0 | 0.0 | 0.0 | 0.0 |
| 1427297_at   | Mrpl9   | MitRibosomal protein | 0.0 | 0.0 | 0.0 | 0.0 | 1.4 | 1.4 |
| 1427901_at   | Mrps18c | MitRibosomal protein | 0.0 | 0.0 | 0.0 | 0.0 | 0.0 | 0.0 |
| 1428302_at   | Mrpl48  | MitRibosomal protein | 0.0 | 0.0 | 0.0 | 0.0 | 1.6 | 0.0 |
| 1428709_a_at | Mrpl24  | MitRibosomal protein | 0.0 | 0.0 | 0.0 | 0.0 | 0.0 | 0.0 |
| 1429054_at   | Mrpl47  | MitRibosomal protein | 0.0 | 0.0 | 0.0 | 1.4 | 1.3 | 1.5 |
| 1429453_a_at | Mrpl55  | MitRibosomal protein | 0.0 | 0.0 | 0.0 | 1.3 | 1.4 | 1.4 |
| 1430976_a_at | Mrpl9   | MitRibosomal protein | 0.0 | 0.0 | 0.0 | 0.0 | 0.0 | 0.0 |
| 1433878_at   | Mrps26  | MitRibosomal protein | 0.0 | 0.0 | 0.0 | 0.0 | 0.0 | 0.0 |
| 1434971_x_at | Mrpl15  | MitRibosomal protein | 0.0 | 0.0 | 0.0 | 0.0 | 1.4 | 0.0 |
| 1435232_x_at | Mrpl15  | MitRibosomal protein | 0.0 | 0.0 | 0.0 | 1.3 | 1.4 | 1.4 |
| 1435843_x_at | Mrps9   | MitRibosomal protein | 0.0 | 0.0 | 0.0 | 0.0 | 0.0 | 0.0 |
| 1435966_x_at | Mrpl13  | MitRibosomal protein | 0.0 | 0.0 | 0.0 | 0.0 | 0.0 | 0.0 |
| 1435995_at   | Mrpl22  | MitRibosomal protein | 0.0 | 0.0 | 0.0 | 0.0 | 0.0 | 0.0 |
| 1437131_x_at | Mrpl11  | MitRibosomal protein | 0.0 | 0.0 | 0.0 | 0.0 | 0.0 | 0.0 |
| 1437391_x_at | Mrpl44  | MitRibosomal protein | 0.0 | 0.0 | 0.0 | 0.0 | 0.0 | 0.0 |
| 1437622_x_at | Mrpl28  | MitRibosomal protein | 0.0 | 0.0 | 0.0 | 0.0 | 0.0 | 0.0 |
| 1437839_x_at | Mrpl11  | MitRibosomal protein | 0.0 | 0.0 | 0.0 | 0.0 | 0.0 | 0.0 |
| 1437997_x_at | Mrpl48  | MitRibosomal protein | 0.0 | 0.0 | 0.0 | 0.0 | 0.0 | 1.3 |
| 1438014_at   | Mrpl34  | MitRibosomal protein | 0.0 | 0.0 | 0.0 | 0.0 | 0.0 | 1.8 |
| 1438563_s_at | Mrps24  | MitRibosomal protein | 0.0 | 0.0 | 0.0 | 0.0 | 0.0 | 0.0 |
| 1439210_at   | Mrps9   | MitRibosomal protein | 0.0 | 0.0 | 0.0 | 0.0 | 0.0 | 0.0 |
| 1447961_s_at | Mrpl38  | MitRibosomal protein | 0.0 | 0.0 | 0.0 | 0.0 | 0.0 | 0.0 |
| 1448373_at   | Mrpl18  | MitRibosomal protein | 0.0 | 0.0 | 0.0 | 1.4 | 1.5 | 1.6 |
| 1448488_at   | Mrps5   | MitRibosomal protein | 0.0 | 0.0 | 1.2 | 0.0 | 0.0 | 0.0 |

|              |         |                      |     |      |     |      |     |     |
|--------------|---------|----------------------|-----|------|-----|------|-----|-----|
| 1448699_at   | Mrpl54  | MitRibosomal protein | 0.0 | 0.0  | 0.0 | 0.0  | 0.0 | 0.0 |
| 1448799_s_at | Mrps12  | MitRibosomal protein | 0.0 | 0.0  | 0.0 | 0.0  | 0.0 | 0.0 |
| 1448811_at   | Mrpl2   | MitRibosomal protein | 0.0 | 0.0  | 0.0 | 0.0  | 0.0 | 0.0 |
| 1448849_at   | Mrpl40  | MitRibosomal protein | 0.0 | 0.0  | 0.0 | 0.0  | 0.0 | 0.0 |
| 1448869_a_at | Mrps16  | MitRibosomal protein | 0.0 | 0.0  | 0.0 | 0.0  | 1.3 | 1.4 |
| 1448909_a_at | Mrpl39  | MitRibosomal protein | 0.0 | 0.0  | 0.0 | 0.0  | 0.0 | 0.0 |
| 1448921_a_at | Mrps9   | MitRibosomal protein | 0.0 | 0.0  | 0.0 | 0.0  | 0.0 | 1.4 |
| 1449004_at   | Mrpl46  | MitRibosomal protein | 0.0 | 0.0  | 0.0 | 1.3  | 1.2 | 1.3 |
| 1449194_at   | Mrps25  | MitRibosomal protein | 0.0 | 0.0  | 0.0 | 0.0  | 0.0 | 0.0 |
| 1449294_at   | Mrps15  | MitRibosomal protein | 0.0 | 0.0  | 0.0 | 0.0  | 0.0 | 0.0 |
| 1450405_at   | Mrpl19  | MitRibosomal protein | 0.0 | 0.0  | 0.0 | 1.6  | 1.5 | 1.4 |
| 1450866_a_at | Mrpl17  | MitRibosomal protein | 0.0 | 0.0  | 0.0 | 0.0  | 0.0 | 0.0 |
| 1450867_at   | Mrpl17  | MitRibosomal protein | 0.0 | 0.0  | 0.0 | -1.7 | 0.0 | 0.0 |
| 1450880_at   | Mrpl16  | MitRibosomal protein | 0.0 | 0.0  | 0.0 | 0.0  | 0.0 | 1.3 |
| 1450948_a_at | Mrpl1   | MitRibosomal protein | 0.0 | 0.0  | 0.0 | 0.0  | 0.0 | 0.0 |
| 1451164_a_at | Mrps18b | MitRibosomal protein | 0.0 | 0.0  | 0.0 | 1.2  | 1.4 | 1.4 |
| 1451178_at   | Mrpl53  | MitRibosomal protein | 0.0 | 0.0  | 0.0 | 0.0  | 0.0 | 0.0 |
| 1451266_at   | Mrpl50  | MitRibosomal protein | 0.0 | 0.0  | 0.0 | 0.0  | 0.0 | 1.3 |
| 1451307_at   | Mrpl14  | MitRibosomal protein | 0.0 | 0.0  | 0.0 | 0.0  | 0.0 | 0.0 |
| 1452048_at   | Mrpl12  | MitRibosomal protein | 1.2 | 0.0  | 0.0 | 1.7  | 1.6 | 1.5 |
| 1452144_a_at | Mrpl44  | MitRibosomal protein | 0.0 | 0.0  | 0.0 | 0.0  | 0.0 | 0.0 |
| 1452585_at   | Mrps28  | MitRibosomal protein | 0.0 | 0.0  | 0.0 | 0.0  | 0.0 | 0.0 |
| 1453571_at   | Mrpl19  | MitRibosomal protein | 0.0 | 0.0  | 1.3 | 0.0  | 0.0 | 0.0 |
| 1453725_a_at | Mrps7   | MitRibosomal protein | 0.0 | 0.0  | 0.0 | 0.0  | 0.0 | 0.0 |
| 1453728_a_at | Mrps17  | MitRibosomal protein | 0.0 | 0.0  | 0.0 | 1.3  | 0.0 | 0.0 |
| 1453954_a_at | Mrps5   | MitRibosomal protein | 0.0 | 0.0  | 0.0 | 0.0  | 0.0 | 1.4 |
| 1456109_a_at | Mrps15  | MitRibosomal protein | 0.0 | 0.0  | 0.0 | 0.0  | 0.0 | 0.0 |
| 1456313_x_at | Mrpl28  | MitRibosomal protein | 0.0 | 0.0  | 0.0 | 0.0  | 0.0 | 0.0 |
| 1460195_at   | Mrps11  | MitRibosomal protein | 0.0 | -1.3 | 0.0 | 0.0  | 0.0 | 0.0 |
| 1460225_at   | Mrp63   | MitRibosomal protein | 0.0 | 0.0  | 0.0 | -1.3 | 0.0 | 0.0 |
| 1460354_a_at | Mrpl13  | MitRibosomal protein | 0.0 | 0.0  | 0.0 | 0.0  | 0.0 | 0.0 |
| 1460701_a_at | Mrpl52  | MitRibosomal protein | 0.0 | 0.0  | 0.0 | 0.0  | 0.0 | 0.0 |
| 1416345_at   | Timm8a  | TIMMS & TOMMS        | 0.0 | 0.0  | 1.6 | 2.1  | 1.4 | 1.4 |
| 1416346_at   | Timm8a  | TIMMS & TOMMS        | 0.0 | 0.0  | 0.0 | 1.7  | 1.5 | 1.6 |
| 1416485_at   | Timm23  | TIMMS & TOMMS        | 0.0 | 0.0  | 0.0 | 1.4  | 1.3 | 1.2 |
| 1417192_at   | Tomm70a | TIMMS & TOMMS        | 0.0 | 0.0  | 0.0 | 1.6  | 1.4 | 0.0 |
| 1417499_at   | Timm13a | TIMMS & TOMMS        | 0.0 | 0.0  | 0.0 | 1.4  | 0.0 | 0.0 |
| 1417670_at   | Timm44  | TIMMS & TOMMS        | 0.0 | 0.0  | 0.0 | 1.3  | 1.5 | 1.5 |
| 1417916_a_at | Fxc1    | TIMMS & TOMMS        | 0.0 | 0.0  | 0.0 | 0.0  | 0.0 | 0.0 |
| 1423079_a_at | Tomm20  | TIMMS & TOMMS        | 0.0 | 0.0  | 0.0 | 0.0  | 1.3 | 0.0 |
| 1423080_at   | Tomm20  | TIMMS & TOMMS        | 0.0 | 0.0  | 0.0 | 1.2  | 0.0 | 0.0 |
| 1423081_a_at | Tomm20  | TIMMS & TOMMS        | 0.0 | 0.0  | 0.0 | 0.0  | 0.0 | 0.0 |
| 1426118_a_at | Tomm40  | TIMMS & TOMMS        | 0.0 | 0.0  | 0.0 | 1.2  | 1.3 | 1.4 |
| 1426256_at   | Timm17a | TIMMS & TOMMS        | 0.0 | 0.0  | 0.0 | 1.2  | 1.4 | 0.0 |
| 1426675_at   | Tomm70a | TIMMS & TOMMS        | 0.0 | 0.0  | 0.0 | 0.0  | 0.0 | 0.0 |
| 1426676_s_at | Tomm70a | TIMMS & TOMMS        | 0.0 | 0.0  | 1.3 | 1.4  | 0.0 | 1.6 |
| 1428214_at   | Tomm7   | TIMMS & TOMMS        | 0.0 | 0.0  | 0.0 | 0.0  | 0.0 | 0.0 |
| 1428215_x_at | Tomm7   | TIMMS & TOMMS        | 0.0 | 0.0  | 0.0 | 0.0  | 0.0 | 0.0 |

|                                            |          |                      |     |     |     |     |      |      |
|--------------------------------------------|----------|----------------------|-----|-----|-----|-----|------|------|
| 1428216_s_at                               | Tomm7    | TIMMS & TOMMS        | 0.0 | 0.0 | 0.0 | 0.0 | 0.0  | 0.0  |
| 1431665_a_at                               | Timm8b   | TIMMS & TOMMS        | 0.0 | 0.0 | 0.0 | 0.0 | 0.0  | 1.5  |
| 1434732_x_at                               | Tomm7    | TIMMS & TOMMS        | 0.0 | 0.0 | 0.0 | 0.0 | 0.0  | 0.0  |
| 1435534_a_at                               | Tomm20   | TIMMS & TOMMS        | 0.0 | 0.0 | 0.0 | 0.0 | 0.0  | 0.0  |
| 1438656_x_at                               | Timm17b  | TIMMS & TOMMS        | 0.0 | 0.0 | 0.0 | 0.0 | 0.0  | -1.4 |
| 1439371_x_at                               | Timm44   | TIMMS & TOMMS        | 0.0 | 0.0 | 0.0 | 0.0 | 0.0  | 0.0  |
| 1448345_at                                 | Tomm34   | TIMMS & TOMMS        | 0.0 | 0.0 | 0.0 | 0.0 | 0.0  | 0.0  |
| 1448517_at                                 | Timm22   | TIMMS & TOMMS        | 0.0 | 0.0 | 1.3 | 1.4 | 1.4  | 0.0  |
| 1448801_a_at                               | Timm44   | TIMMS & TOMMS        | 0.0 | 0.0 | 0.0 | 0.0 | 1.3  | 1.5  |
| 1449886_a_at                               | Timm10   | TIMMS & TOMMS        | 0.0 | 0.0 | 0.0 | 1.9 | 1.6  | 0.0  |
| 1455211_a_at                               | Timm9    | TIMMS & TOMMS        | 0.0 | 0.0 | 0.0 | 0.0 | 1.3  | 1.3  |
| 1455357_x_at                               | Tomm20   | TIMMS & TOMMS        | 0.0 | 0.0 | 0.0 | 1.6 | 0.0  | 0.0  |
| 1455456_a_at                               | Timm50   | TIMMS & TOMMS        | 0.0 | 0.0 | 0.0 | 0.0 | 0.0  | 0.0  |
| 1460685_at                                 | Timm17b  | TIMMS & TOMMS        | 0.0 | 0.0 | 0.0 | 0.0 | 0.0  | 0.0  |
| <b>Probe sets in Figure 3B</b>             |          |                      |     |     |     |     |      |      |
| 1429533_at                                 | Immt     | Structure            | 0.0 | 0.0 | 0.0 | 0.0 | 0.0  | 1.4  |
| 1429534_a_at                               | Immt     | Structure            | 0.0 | 0.0 | 0.0 | 0.0 | 1.2  | 1.3  |
| 1433470_a_at                               | Immt     | Structure            | 0.0 | 0.0 | 0.0 | 0.0 | 1.4  | 1.4  |
| 1418768_at                                 | Opa1     | Structure            | 0.0 | 0.0 | 0.0 | 0.0 | 0.0  | 0.0  |
| 1449214_a_at                               | Opa1     | Structure            | 0.0 | 0.0 | 0.0 | 0.0 | 1.5  | 1.6  |
| 1451541_at                                 | Bcs1l    | Structure            | 0.0 | 0.0 | 0.0 | 0.0 | 1.4  | 1.4  |
| 1450561_a_at                               | Surf1    | Structure            | 0.0 | 0.0 | 0.0 | 0.0 | -1.3 | 0.0  |
| <b>Probe sets in Figure 3C</b>             |          |                      |     |     |     |     |      |      |
| 1460652_at                                 | Esrra    | Transcription factor | 0.0 | 0.0 | 0.0 | 1.6 | 1.4  | 1.5  |
| 1450664_at                                 | Gabpa    | Transcription factor | 0.0 | 0.0 | 0.0 | 0.0 | 0.0  | 0.0  |
| 1450665_at                                 | Gabpa    | Transcription factor | 0.0 | 0.0 | 0.0 | 0.0 | 0.0  | 0.0  |
| 1436232_a_at                               | Gabpb1   | Transcription factor | 0.0 | 0.0 | 0.0 | 0.0 | 0.0  | 0.0  |
| 1419761_a_at                               | Gabpb1   | Transcription factor | 0.0 | 0.0 | 0.0 | 0.0 | 0.0  | 0.0  |
| 1450444_a_at                               | Nr1h3    | Transcription factor | 0.0 | 0.0 | 0.0 | 0.0 | 0.0  | 0.0  |
| 1424787_a_at                               | Nrf1     | Transcription factor | 0.0 | 0.0 | 0.0 | 0.0 | 0.0  | 0.0  |
| 1434627_at                                 | Nrf1     | Transcription factor | 0.0 | 0.0 | 0.0 | 0.0 | 0.0  | 0.0  |
| 1418469_at                                 | Nrip1    | Transcription factor | 0.0 | 2.2 | 0.0 | 0.0 | 0.0  | 0.0  |
| 1449089_at                                 | Nrip1    | Transcription factor | 0.0 | 2.2 | 0.0 | 1.7 | 0.0  | 0.0  |
| 1449051_at                                 | Ppara    | Transcription factor | 0.0 | 0.0 | 0.0 | 8.4 | 9.9  | 9.0  |
| 1460336_at                                 | Ppargc1a | Transcription factor | 0.0 | 0.0 | 0.0 | 0.0 | 2.3  | 0.0  |
| 1449945_at                                 | Ppargc1b | Transcription factor | 0.0 | 0.0 | 3.3 | 3.2 | 2.1  | 1.9  |
| 1426381_at                                 | Pprc1    | Transcription factor | 0.0 | 0.0 | 0.0 | 0.0 | 0.0  | 0.0  |
| 1448224_at                                 | Tfam     | Transcription factor | 0.0 | 0.0 | 0.0 | 0.0 | 0.0  | 0.0  |
| 1449749_s_at                               | Tfb1m    | Transcription factor | 0.0 | 0.0 | 0.0 | 0.0 | 1.2  | 0.0  |
| 1423441_at                                 | Tfb2m    | Transcription factor | 1.3 | 0.0 | 0.0 | 0.0 | 0.0  | 0.0  |
| <b>Probe sets in Supplemental Figure 3</b> |          |                      |     |     |     |     |      |      |
| 1417867_at                                 | Adn      |                      | 0.0 | 0.0 | 0.0 | 0.0 | -1.6 | -1.4 |
| 1423828_at                                 | Fasn     |                      | 0.0 | 0.0 | 0.0 | 0.0 | 0.0  | 0.0  |
| 1434773_a_at                               | Slc2a1   |                      | 0.0 | 0.0 | 0.0 | 0.0 | 0.0  | 0.0  |
| 1426600_at                                 | Slc2a1   |                      | 0.0 | 0.0 | 0.0 | 0.0 | 0.0  | 0.0  |
| 1426599_a_at                               | Slc2a1   |                      | 0.0 | 0.0 | 0.0 | 0.0 | 0.0  | 0.0  |
| <b>Probe sets mentioned in Discussion</b>  |          |                      |     |     |     |     |      |      |
| 1422820_at                                 | Lipe     |                      | 0.0 | 0.0 | 1.3 | 1.3 | 0.0  | 0.0  |

|              |        |  |     |     |     |     |     |     |
|--------------|--------|--|-----|-----|-----|-----|-----|-----|
| 1428143_a_at | Pnpla2 |  | 0.0 | 0.0 | 0.0 | 0.0 | 0.0 | 0.0 |
| 1428591_at   | Pnpla2 |  | 0.0 | 0.0 | 1.5 | 1.5 | 0.0 | 1.7 |
| 1427367_at   | Pnpla2 |  | 0.0 | 0.0 | 0.0 | 0.0 | 0.0 | 0.0 |

**Supplemental Table 5. Confirmation of the microarray data using QRT-PCR.** The

numerical data are expressed as mean  $-\Delta\Delta C_t$ , equivalent to log<sub>2</sub>-transformed fold

changes (RSG over DMSO). N = 3 per time point in each cell type. \*p < 0.05.

**3T3 L1 Adipocytes**

| Gene Name | 1hr   | 2hr    | 4hr    | 7hr    | 24hr   | 48hr   |
|-----------|-------|--------|--------|--------|--------|--------|
| Hadha     | -0.27 | 0.41   | 0.32   | 0.5 *  | 1.35 * | 1.97 * |
| Cidea     | -0.16 | -0.12  | 0.34   | 0.69   | 2.07 * | 3.82 * |
| Cpt1b     | -0.21 | 0.3    | 0.52   | 0.63   | 2.67 * | 3.74 * |
| Cs        | -0.15 | 0.2    | 0.15   | 0.32   | 0.97 * | 1.18 * |
| Cycs      | -0.09 | 0.57 * | 0.77 * | 1.4 *  | 2.23 * | 2.57 * |
| Idh3a     | -0.12 | 0.46   | 0.61 * | 0.93 * | 2.05 * | 2.33 * |
| Opa1      | -0.22 | 0.29   | 0.31   | 0.24   | 0.73 * | 1.08 * |
| Ppargc1b  | -0.02 | 1.05 * | 0.98 * | 1.31 * | 1.78 * | 1.62 * |

**C3H10T1/2 Adipocytes**

| Gene Name | 1hr  | 2hr    | 4hr    | 7hr    | 24hr   | 48hr   |
|-----------|------|--------|--------|--------|--------|--------|
| Hadha     | 0.06 | 0.11   | 0.22   | -0.02  | 1.21 * | 1.28 * |
| Cidea     | 0.06 | 0.11   | 0.22   | -0.06  | 1.5 *  | 1.91 * |
| Cpt1b     | 0.02 | 0.01   | 0.28   | 0.6 *  | 3.34 * | 3.41 * |
| Cs        | 0.04 | -0.08  | 0.14   | 0.11   | 0.73 * | 0.62 * |
| Cycs      | 0.04 | 0.1    | 0.28   | 0.23   | 1.51 * | 1.34 * |
| Idh3a     | 0.07 | -0.06  | 0.63 * | 1.09 * | 1.53 * | 1.3 *  |
| Opa1      | 0.01 | 0.11   | 0.35   | -0.31  | 0.87 * | 0.52   |
| Ppargc1b  | 0.22 | 1.31 * | 1.88 * | 1.71 * | 1.29 * | 1.31 * |

**Supplemental Table 6. Presence of PPAR-responsive element consensus regions on the promoters of nucleus-encoded mitochondrial genes.** The gene promoter sequences were acquired from PromoSer database (<http://biowulf.bu.edu/zlab/PromoSer/>). Each promoter contains 2000 bases upstream and 100 bases downstream relative to the 5' transcription start site (TSS). The PPAR-responsive elements on gene promoters are identified through MATCH program using transcription factor binding matrix of PPAR\_DR1\_Q2 and PPARG\_Q3 in TRANSFAC Professional database (V8.1, <http://www.biobase-international.com>). Only genes with promoters containing sequences with an exact match (score = 1) of the core elements and a score of > 0.75 for the matrix match are listed.

| Gene Symbol | Reference Sequence Number | Category | Number of matches | Positions Relative to TSS      | Regulation in 3T3-L1 | Regulation in C3H/10T1/2 |
|-------------|---------------------------|----------|-------------------|--------------------------------|----------------------|--------------------------|
| Acad9       | NM_172678                 | FAO      | 1                 | -1385,                         | UP                   | NC                       |
| Acadl       | NM_007381                 | FAO      | 1                 | -1851,                         | UP                   | UP                       |
| Acadm       | NM_007382                 | FAO      | 1                 | -198,                          | UP                   | UP                       |
| Acat2       | NM_009338                 | FAO      | 1                 | -558,                          | UP                   | UP                       |
| Acox1       | NM_015729                 | FAO      | 4                 | 52, -297, -440, -1478,         | UP                   | UP                       |
| Acsf5       | NM_027976                 | FAO      | 5                 | -43, -119, -221, -1115, -1853, | Down                 | Down                     |
| Cpt1b       | NM_009948                 | FAO      | 2                 | -246, -1454,                   | UP                   | UP                       |
| Decr1       | NM_026172                 | FAO      | 1                 | -1227,                         | UP                   | UP                       |
| Ech1        | NM_016772                 | FAO      | 3                 | -134, -559, -1123,             | UP                   | UP                       |
| Echdc3      | NM_024208                 | FAO      | 1                 | -1388,                         | NC                   | NC                       |
| Echs1       | NM_053119                 | FAO      | 1                 | -192,                          | UP                   | NC                       |
| Gcdh        | NM_001044744              | FAO      | 1                 | -1516,                         | NC                   | NC                       |
| Hadhb       | NM_145558                 | FAO      | 1                 | -306,                          | UP                   | UP                       |
| Hadhs       | NM_008212                 | FAO      | 1                 | 45,                            | UP                   | UP                       |
| Hibch       | NM_146108                 | FAO      | 1                 | -150,                          | UP                   | NC                       |

|               |           |            |   |                    |      |      |
|---------------|-----------|------------|---|--------------------|------|------|
| Hsd17b4       | NM_008292 | FAO        | 2 | -1060, -1360,      | UP   | UP   |
| MGC29978      | NM_146230 | FAO        | 3 | -580, -825, -954,  | UP   | UP   |
| Psap          | NM_011179 | FAO        | 1 | -1049,             | NC   | NC   |
| Etfb          | NM_026695 | OXPHOS/FAO | 1 | -141,              | UP   | UP   |
| 0610006O14Rik | NM_133764 | OXPHOS     | 1 | -1678,             | Down | Down |
| 1500032D16Rik | NM_030087 | OXPHOS     | 1 | -448,              | UP   | UP   |
| Atp5b         | NM_016774 | OXPHOS     | 2 | -601, -622,        | UP   | NC   |
| Atp5c1        | NM_020615 | OXPHOS     | 1 | -1236,             | UP   | UP   |
| Atp5d         | NM_025313 | OXPHOS     | 1 | -674,              | UP   | UP   |
| Atp5f1        | NM_009725 | OXPHOS     | 2 | -389, -471,        | UP   | UP   |
| Atp5g3        | NM_175015 | OXPHOS     | 1 | -1099,             | UP   | NC   |
| Atp5j2        | NM_020582 | OXPHOS     | 1 | -1869,             | UP   | UP   |
| Atp5l         | NM_013795 | OXPHOS     | 2 | -385, -1491,       | UP   | UP   |
| Atp5o         | NM_138597 | OXPHOS     | 1 | -924,              | UP   | UP   |
| Atp6v1a1      | NM_007508 | OXPHOS     | 1 | -31,               | NC   | NC   |
| Cox15         | NM_144874 | OXPHOS     | 1 | -1786,             | UP   | UP   |
| Cox5a         | NM_007747 | OXPHOS     | 1 | -451,              | UP   | UP   |
| Cox5b         | NM_009942 | OXPHOS     | 3 | -154, -489, -1087, | UP   | UP   |
| Cox6a1        | NM_007748 | OXPHOS     | 1 | -579,              | UP   | UP   |
| Cox7a1        | NM_009944 | OXPHOS     | 1 | -825,              | UP   | UP   |
| Cox7a2l       | NM_009187 | OXPHOS     | 1 | -1467,             | UP   | UP   |
| Cox8a         | NM_007750 | OXPHOS     | 2 | -1082, -1987,      | UP   | NC   |
| Cyc1          | NM_025567 | OXPHOS     | 1 | -629,              | UP   | UP   |
| Cycs          | NM_007808 | OXPHOS     | 2 | -360, -434,        | UP   | UP   |
| Ndufa1        | NM_019443 | OXPHOS     | 1 | -1111,             | UP   | UP   |
| Ndufa10       | NM_024197 | OXPHOS     | 2 | -135, -1078,       | UP   | UP   |
| Ndufa2        | NM_010885 | OXPHOS     | 1 | 71,                | NC   | UP   |
| Ndufa8        | NM_026703 | OXPHOS     | 1 | -925,              | UP   | UP   |
| Ndufa9        | NM_025358 | OXPHOS     | 2 | -380, -1479,       | UP   | UP   |

|         |           |            |   |                      |      |    |
|---------|-----------|------------|---|----------------------|------|----|
| Ndufab1 | NM_028177 | OXPHOS     | 1 | -1966,               | UP   | UP |
| Ndufb10 | NM_026684 | OXPHOS     | 2 | -894, -1166,         | UP   | UP |
| Ndufb2  | NM_026612 | OXPHOS     | 1 | -117,                | UP   | NC |
| Ndufb5  | NM_025316 | OXPHOS     | 2 | -922, -1310,         | UP   | UP |
| Ndufc2  | NM_024220 | OXPHOS     | 1 | -31,                 | UP   | UP |
| Ndufs1  | NM_145518 | OXPHOS     | 3 | 69, 2, -761,         | UP   | UP |
| Ndufs2  | NM_153064 | OXPHOS     | 1 | -470,                | UP   | UP |
| Ndufs7  | NM_029272 | OXPHOS     | 1 | -1173,               | UP   | UP |
| Ndufs8  | NM_144870 | OXPHOS     | 3 | -660, -854, -986,    | UP   | UP |
| Ndufv1  | NM_133666 | OXPHOS     | 1 | -1200,               | UP   | UP |
| Ndufv2  | NM_028388 | OXPHOS     | 1 | -1934,               | UP   | UP |
| Np15    | NM_019435 | OXPHOS     | 1 | -961,                | UP   | UP |
| Uqcr    | NM_025650 | OXPHOS     | 3 | -577, -1208, -1626,  | UP   | UP |
| Uqcrc2  | NM_025899 | OXPHOS     | 1 | -25,                 | UP   | UP |
| Uqcrfs1 | NM_025710 | OXPHOS     | 3 | -1616, -1728, -1954, | UP   | UP |
| Uqcrrh  | NM_025641 | OXPHOS     | 1 | -1750,               | UP   | UP |
| Sdhb    | NM_023374 | OXPHOS/TCA | 3 | -24, -676, -1841,    | UP   | UP |
| Aco2    | NM_080633 | TCA        | 3 | -103, -457, -1771,   | UP   | UP |
| Cs      | NM_026444 | TCA        | 2 | -203, -1008,         | UP   | UP |
| Dlat    | NM_145614 | TCA        | 1 | -185,                | UP   | UP |
| Dld     | NM_007861 | TCA        | 2 | -1549, -1736,        | UP   | UP |
| Fh1     | NM_010209 | TCA        | 1 | -1238,               | UP   | UP |
| Idh2    | NM_173011 | TCA        | 2 | -736, -1367,         | NC   | NC |
| Idh3a   | NM_029573 | TCA        | 1 | -1063,               | UP   | UP |
| Idh3b   | NM_130884 | TCA        | 1 | -1042,               | UP   | UP |
| Pck2    | NM_028994 | TCA        | 2 | -1764, -1970,        | Down | NC |
| Pcx     | NM_008797 | TCA        | 2 | -1660, -1666,        | UP   | UP |
| Pdha1   | NM_008810 | TCA        | 2 | -282, -410,          | UP   | UP |
| Pdhb    | NM_024221 | TCA        | 1 | -628,                | UP   | UP |



|          |           |                      |   |                    |      |      |
|----------|-----------|----------------------|---|--------------------|------|------|
| Pdk1     | NM_172665 | TCA                  | 1 | -1617,             | UP   | UP   |
| Pdk3     | NM_145630 | TCA                  | 1 | -664,              | Down | NC   |
| Pdk4     | NM_013743 | TCA                  | 1 | -1279,             | UP   | UP   |
| Suc1a2   | NM_011506 | TCA                  | 1 | -205,              | UP   | UP   |
| Suc1g1   | NM_019879 | TCA                  | 2 | -169, -1485,       | UP   | UP   |
| Suc1g2   | NM_011507 | TCA                  | 1 | -1604,             | NC   | Down |
| Ucp1     | NM_009463 | UCP                  | 1 | 58,                | NC   | NC   |
| Ucp3     | NM_009464 | UCP                  | 1 | -49,               | UP   | UP   |
| Gpd2     | NM_010274 | ATP_Shuttle          | 2 | -496, -1073,       | NC   | NC   |
| Slc25a20 | NM_020520 | ATP_Shuttle          | 2 | 88, -764,          | UP   | UP   |
| Slc25a25 | NM_146118 | ATP_Shuttle          | 2 | -1569, -1694,      | UP   | NC   |
| Slc25a3  | NM_133668 | ATP_Shuttle          | 2 | -1051, -1928,      | UP   | NC   |
| Slc25a5  | NM_007451 | ATP_Shuttle          | 1 | -1030,             | UP   | UP   |
| Vdac2    | NM_011695 | VDAC                 | 1 | -599,              | UP   | UP   |
| Vdac3    | NM_011696 | VDAC                 | 1 | -185,              | NC   | NC   |
| Dnaja3   | NM_023646 | MitHSP               | 1 | -1352,             | UP   | UP   |
| Grpel1   | NM_024478 | MitHSP               | 1 | -199,              | UP   | UP   |
| Grpel2   | NM_021296 | MitHSP               | 1 | -1753,             | UP   | NC   |
| Hspa9a   | NM_010481 | MitHSP               | 2 | -237, -447,        | UP   | UP   |
| Hspd1    | NM_010477 | MitHSP               | 2 | -708, -1184,       | UP   | UP   |
| Hspe1    | NM_008303 | MitHSP               | 3 | -41, -1339, -1373, | UP   | UP   |
| Mrpl13   | NM_026759 | MitRibosomal protein | 2 | -84, -1970,        | Down | NC   |
| Mrpl14   | NM_026732 | MitRibosomal protein | 3 | -596, -928, -1217, | NC   | NC   |
| Mrpl15   | NM_025300 | MitRibosomal protein | 2 | -1292, -1862,      | UP   | UP   |
| Mrpl16   | NM_025606 | MitRibosomal protein | 2 | -101, -1640,       | NC   | UP   |
| Mrpl17   | NM_025301 | MitRibosomal protein | 2 | -435, -444,        | Down | NC   |
| Mrpl18   | NM_026310 | MitRibosomal protein | 1 | -242,              | UP   | UP   |
| Mrpl2    | NM_025302 | MitRibosomal protein | 1 | -1309,             | Down | NC   |
| Mrpl22   | NM_175001 | MitRibosomal protein | 1 | -1765,             | Down | NC   |

|         |           |                      |   |                           |      |      |
|---------|-----------|----------------------|---|---------------------------|------|------|
| Mrpl24  | NM_026591 | MitRibosomal protein | 3 | -1279, -1731, -1848,      | Down | NC   |
| Mrpl28  | NM_024227 | MitRibosomal protein | 1 | -891,                     | NC   | NC   |
| Mrpl30  | NM_027098 | MitRibosomal protein | 1 | -1238,                    | NC   | UP   |
| Mrpl36  | NM_053163 | MitRibosomal protein | 1 | -17,                      | NC   | NC   |
| Mrpl37  | NM_025500 | MitRibosomal protein | 1 | -643,                     | NC   | UP   |
| Mrpl38  | NM_024177 | MitRibosomal protein | 1 | -745,                     | NC   | NC   |
| Mrpl40  | NM_010922 | MitRibosomal protein | 1 | -1263,                    | Down | NC   |
| Mrpl45  | NM_025927 | MitRibosomal protein | 1 | -357,                     | UP   | UP   |
| Mrpl46  | NM_023331 | MitRibosomal protein | 1 | -406,                     | UP   | UP   |
| Mrpl49  | NM_026246 | MitRibosomal protein | 4 | -437, -867, -1426, -1553, | UP   | NC   |
| Mrpl50  | NM_178603 | MitRibosomal protein | 1 | -57,                      | NC   | UP   |
| Mrpl53  | NM_026744 | MitRibosomal protein | 1 | -1799,                    | UP   | NC   |
| Mrpl55  | NM_026035 | MitRibosomal protein | 2 | -1794, -1954,             | UP   | UP   |
| Mrpl9   | NM_030116 | MitRibosomal protein | 1 | -1950,                    | UP   | UP   |
| Mrps11  | NM_026498 | MitRibosomal protein | 1 | -1624,                    | NC   | Down |
| Mrps12  | NM_011885 | MitRibosomal protein | 2 | -1778, -1936,             | NC   | NC   |
| Mrps15  | NM_025544 | MitRibosomal protein | 1 | -1179,                    | Down | NC   |
| Mrps16  | NM_025440 | MitRibosomal protein | 1 | -1859,                    | UP   | UP   |
| Mrps17  | NM_025450 | MitRibosomal protein | 1 | -1364,                    | NC   | UP   |
| Mrps18a | NM_026768 | MitRibosomal protein | 1 | -880,                     | UP   | NC   |
| Mrps18c | NM_026826 | MitRibosomal protein | 1 | -1452,                    | NC   | NC   |
| Mrps2   | NM_080452 | MitRibosomal protein | 2 | -168, -1535,              | UP   | UP   |
| Mrps22  | NM_025485 | MitRibosomal protein | 3 | 13, -16, -754,            | NC   | NC   |
| Mrps24  | NM_026080 | MitRibosomal protein | 1 | -1676,                    | NC   | NC   |
| Mrps28  | NM_025434 | MitRibosomal protein | 2 | 47, -133,                 | UP   | NC   |
| Mrps33  | NM_010270 | MitRibosomal protein | 2 | -55, -116,                | NC   | NC   |
| Mrps34  | NM_023260 | MitRibosomal protein | 1 | -1929,                    | UP   | UP   |
| Mrps36  | NM_025369 | MitRibosomal protein | 1 | -362,                     | NC   | UP   |
| Mrps5   | NM_029963 | MitRibosomal protein | 1 | -732,                     | UP   | UP   |

|          |              |                      |   |                   |    |    |
|----------|--------------|----------------------|---|-------------------|----|----|
| Timm13a  | NM_013899    | TIMMS & TOMMS        | 3 | -685, -790, -957, | UP | UP |
| Timm50   | NM_025616    | TIMMS & TOMMS        | 2 | -408, -1027,      | NC | NC |
| Timm8a   | NM_013898    | TIMMS & TOMMS        | 1 | -892,             | UP | UP |
| Timm8b   | NM_013897    | TIMMS & TOMMS        | 2 | -99, -1676,       | NC | UP |
| Tomm20   | NM_024214    | TIMMS & TOMMS        | 1 | -1743,            | UP | UP |
| Tomm70a  | NM_138599    | TIMMS & TOMMS        | 3 | 11, -176, -1896,  | UP | UP |
| Immt     | NM_029673    | Structure            | 1 | -1904,            | UP | UP |
| Esrra    | NM_007953    | Transcription factor | 2 | -853, -1891,      | UP | UP |
| Gabpa    | NM_008065    | Transcription factor | 3 | -207, -275, -713, | UP | UP |
| Nrf1     | NM_010938    | Transcription factor | 1 | -983,             | UP | UP |
| Ppara    | NM_001113418 | Transcription factor | 1 | -754,             | UP | UP |
| Ppargc1b | NM_133249    | Transcription factor | 2 | -494, -1986,      | UP | UP |
